# Supplementary material
Source: PubMed Central journal article supplement (PMC3340199)
Supplement: supp_M111.301275_jbc.M111.301275-1.pdf [file supp_M111.301275_jbc.M111.301275-1.pdf]

Supplemental Table 1

| Gene/miRNA                      | Primers                                                                                                                                                            | Product length | Application                    |
|---------------------------------|--------------------------------------------------------------------------------------------------------------------------------------------------------------------|----------------|--------------------------------|
| Rhesus-miR-375                  | RT:5'-GTCGTATCCAGTGCAGGGTCCGAGGTATTTCGACTGGATACGACTCACG-3'<br>Forward:5'-TATTTGTTTCGTTCCGGCTCGC-3'<br>Reverse:5'-CAGTGCAGGGTCCGAGGTAT-3'(universal reverse primer) | 60 bp          | qRT-PCR for miRNA              |
| Rhesus-miR-96                   | RT:5'-GTCGTATCCAGTGCAGGGTCCGAGGTATTTCGACTGGATACGACGCAAA-3'<br>Forward:5'-GCCGTTTGGCACTAGCACAT-3'<br>Reverse:5'-CAGTGCAGGGTCCGAGGTAT-3'                             | 62 bp          | qRT-PCR for miRNA              |
| Rhesus-miR-219-5p               | RT:5'-GTCGTATCCAGTGCAGGGTCCGAGGTATTTCGACTGGATACGACAGAAT-3'<br>Forward:5'-CCGCTGATTGTCCAAAGCG-3'<br>Reverse:5'-CAGTGCAGGGTCCGAGGTAT-3'                              | 60 bp          | qRT-PCR for miRNA              |
| Rhesus-miR-423-5p               | RT:5'-GTCGTATCCAGTGCAGGGTCCGAGGTATTTCGACTGGATACGACAAAAGT-3'<br>Forward:5'-TGAGGGGCAGAGAGCGAG-3'<br>Reverse:5'-CAGTGCAGGGTCCGAGGTAT-3'                              | 59 bp          | qRT-PCR for miRNA              |
| Rhesus-miR-940                  | RT:5'-GTCGTATCCAGTGCAGGGTCCGAGGTATTTCGACTGGATACGACGGGGA-3'<br>Forward:5'-ACAAGGCAGGGCCCCCG-3'<br>Reverse:5'-CAGTGCAGGGTCCGAGGTAT-3'                                | 59 bp          | qRT-PCR for miRNA              |
| Rhesus-miR-191                  | RT:5'-GTCGTATCCAGTGCAGGGTCCGAGGTATTTCGACTGGATACGACCAGCT-3'<br>Forward:5'-GTCAACGGAATCCAAAAGC-3'<br>Reverse:5'-CAGTGCAGGGTCCGAGGTAT-3'                              | 61 bp          | qRT-PCR for miRNA              |
| Rhesus-miR-708                  | RT:5'-GTCGTATCCAGTGCAGGGTCCGAGGTATTTCGACTGGATACGACCCAG-3'<br>Forward:5'-CCGCAAGGAGCTTACAATCT-3'<br>Reverse:5'-CAGTGCAGGGTCCGAGGTAT-3'                              | 63 bp          | qRT-PCR for miRNA              |
| Rhesus-miR-543                  | RT:5'-GTCGTATCCAGTGCAGGGTCCGAGGTATTTCGACTGGATACGACAAGAA-3'<br>Forward:5'-TAGCTCAAACATTCGCGGTG-3'<br>Reverse:5'-CAGTGCAGGGTCCGAGGTAT-3'                             | 64 bp          | qRT-PCR for miRNA              |
| Rhesus RGR(long)                | Forward:5'-TTAGAAGACTCCACTG-3'<br>Reverse:5'-TCACCTACAACCTCCTCGT-3'                                                                                                | 133 bp         | qRT-PCR for mRNA               |
| Rhesus PGR(long+short)          | Forward:5'-TACAGTGCCTGATAGGTAGGCG-3'<br>Reverse:5'-CGATTGGGATGACGTTTGTG-3'                                                                                         | 220 bp         | qRT-PCR for mRNA               |
| Rhesus lncRNA-PGR-3p            | Forward:5'-CAGCTTGGGAGGATTTTGG-3'<br>Reverse:5'-AGGGCTACTCTGCCTACGGA-3'                                                                                            | 125 bp         | qRT-PCR for mRNA               |
| Rhesus GAPDH                    | Forward:5'-GAAGGTGAAGGTCGGAGT-3'<br>Reverse:5'-GATGGCAACAATATCCACTT-3'                                                                                             | 94 bp          | qRT-PCR for mRNA               |
| Human-mir-96-target-PGR         | Forward:5'-CCGTGTAATTCTAGAAGTTCATCTAGTCTAGTAGCTT-3'<br>Reverse:5'-TCGAAGCGCCGGCCGAGCCAGTGCAGGAGAAGTGCAGG-3'                                                        | 422 bp         | 3'-UTR construct for luc assay |
| Mouse-mir-96-target-PGR         | Forward:5'-CCGTGTAATTCTAGAAGATGCTTTAGAATAGACAAGTCT-3'<br>Reverse:5'-TCGAAGCGCCGGCCGCTGTATGTTTATATGTTGAGTTAT-3'                                                     | 285 bp         | 3'-UTR construct for luc assay |
| Rhesus-mir-96-target-PGR        | Forward:5'-AGTTCAGACTAGTCTAGTAGCTTTTCGATGC-3'<br>Reverse:5'-AGGGCCGGCCAGGACTGTCAGGCAC-3'                                                                           | 364 bp         | 3'-UTR construct for luc assay |
| Human-mir219-5p-target-PGR      | Forward:5'-CCGTGTAATTCTAGAGATATTATATGGAAGATTGGCAT-3'<br>Reverse:5'-TCGAAGCGCCGGCCATAAACTGGCTTCTTCACTGTGG-3'                                                        | 528 bp         | 3'-UTR construct for luc assay |
| Mouse-mir219-5p-target-PGR      | Forward:5'-CCGTGTAATTCTAGAGCAGCTCTAACAACACTGTATG-3'<br>Reverse:5'-TCGAAGCGCCGGCCCTAGAGTATCCACCTTTGGATTCTT-3'                                                       | 552 bp         | 3'-UTR construct for luc assay |
| Rhesus-mir219-target-lnc-PGR-3p | Forward:5'-GCTCTCTAGATGGAAGATTGGCATTAT-3'<br>Reverse:5'-TTGGCCGGCCCTGCTTTCAGTGTGGACTC-3'                                                                           | 485 bp         | 3'-UTR construct for luc assay |
| Human-mir375-target-PGR         | Forward:5'-CCGTGTAATTCTAGAATGATCATAAACATGAAGAATTGTA-3'<br>Reverse:5'-TCGAAGCGCCGGCCAAATGGGCTTTGATGGAACCTGGTT-3'                                                    | 578 bp         | 3'-UTR construct for luc assay |
| Mouse-mir375-target-PGR         | Forward:5'-CCGTGTAATTCTAGATCATTAAACAGTGGAGAAATAGAGT-3'<br>Reverse:5'-TCGAAGCGCCGGCCGAGTCTCGGCAGTTGGAATTGTAGA-3'                                                    | 285 bp         | 3'-UTR construct for luc assay |
| Rhesus-mir375-target-PGR        | Forward:5'-GTGCTAGAATGGTCATAAACACAGGAGTTG-3'<br>Reverse:5'-GTGGCCGGCCAAATGGGCTTTGATGGAAC-3'                                                                        | 570 bp         | 3'-UTR construct for luc assay |
| Rhesus-LncRNA-PGR-3p            | Forward:5'-TACCAGCTCGGATCCGTTTCTTCTCCAGGTCTTCACTGG-3'<br>Reverse:5'-GACTCGAGCGCCGCCATGATCAGTGTGGAGAGAGCTACA-3'                                                     | 3219 bp        | 3'-UTR construct for luc assay |
| Rhesus Pgr-RT-PCR               | Forward:5'-AAATGAAAGCCAAGCCCTAA-3'<br>Reverse:5'-GGATCTGCCACATGGTAAAGG-3'                                                                                          | 425 bp         | Probe for Northern blot        |
| Rhesus Genomic sequence         | F3:5'-TAAACACGAGGAGTTGTAGGT-3'<br>R3:5'-TTTCACTGTGGACTCCCTCTT-3'                                                                                                   | 3258 bp        | RT-PCR for LncRNA-PGR-3p       |
| Rhesus-LncRNA-PGR-3p            | F2:5'-AGGAGAAAGGTCGGGTGC-3'<br>R2:5'-AGGGCTACTCTGCCTACGG-3'                                                                                                        | 1637 bp        | RT-PCR for LncRNA-PGR-3p       |
| Rhesus Genomic sequence         | F1:5'-AGTTTATTGGAGCAACAGCG-3'<br>R1:5'-CAGGCAGATCAAGGTAGG-3'                                                                                                       | 1673 bp        | RT-PCR for LncRNA-PGR-3p       |

Supplemental Table 2

| Name            | Consevation | D15    | D21    | D15<br>(normalized, rpm) | D21<br>(normalized, rpm) | Folds<br>(D21/D15) | Adjusted pvalue |
|-----------------|-------------|--------|--------|--------------------------|--------------------------|--------------------|-----------------|
| mml-miR-874     | mammal      | 8      | 2      | 0.97                     | 0.28                     | 0.29               | 1               |
| mml-miR-128b    | mammal      | 14863  | 10749  | 1803.43                  | 1528.13                  | 0.85               | 0               |
| mml-miR-450a    | mammal      | 152    | 191    | 18.44                    | 27.15                    | 1.47               | 0.055808354     |
| mml-miR-128a    | mammal      | 2963   | 1500   | 359.52                   | 213.25                   | 0.59               | 0               |
| mml-miR-30c     | mammal      | 1000   | 1930   | 121.34                   | 274.38                   | 2.26               | 1.36E-100       |
| mml-miR-654-5p  | mammal      | 38     | 31     | 4.61                     | 4.41                     | 0.96               | 1               |
| mml-miR-455-5p  | mammal      | 1153   | 361    | 139.90                   | 51.32                    | 0.37               | 0               |
| mml-miR-486-3p  | mammal      | 3      | 0      | 0.36                     | 0.14                     | 0.39               | 1               |
| mml-miR-668     | mammal      | 9      | 36     | 1.09                     | 5.12                     | 4.69               | 0.00079706      |
| mml-miR-147b    | mammal      | 1      | 1      | 0.12                     | 0.14                     | 1.17               | 1               |
| mml-let-7f      | mammal      | 512535 | 481089 | 62189.43                 | 68393.83                 | 1.10               | 0               |
| mml-miR-934     | primate     | 2      | 1      | 0.24                     | 0.14                     | 0.59               | 1               |
| mml-miR-130b    | mammal      | 5956   | 5662   | 722.68                   | 804.94                   | 1.11               | 1.00E-06        |
| mml-miR-33a     | mammal      | 201    | 311    | 24.39                    | 44.21                    | 1.81               | 4.15E-09        |
| mml-miR-299-5p  | mammal      | 1105   | 781    | 134.08                   | 111.03                   | 0.83               | 0.017361529     |
| mml-miR-508     | primate     | 1      | 0      | 0.12                     | 0.14                     | 1.17               | 1               |
| mml-miR-582-5p  | mammal      | 13     | 1      | 1.58                     | 0.14                     | 0.09               | 1               |
| mml-miR-133c    | mammal      | 1      | 4      | 0.12                     | 0.57                     | 4.69               | 1               |
| mml-miR-190a    | mammal      | 6      | 11     | 0.73                     | 1.56                     | 2.15               | 1               |
| mml-miR-301b    | mammal      | 6      | 8      | 0.73                     | 1.14                     | 1.56               | 1               |
| mml-let-7b      | mammal      | 781700 | 616708 | 94849.09                 | 87674.06                 | 0.92               | 0               |
| mml-miR-17-5p   | mammal      | 1847   | 225    | 224.11                   | 31.99                    | 0.14               | 0               |
| mml-miR-23b     | mammal      | 9895   | 9446   | 1200.63                  | 1342.89                  | 1.12               | 1.06E-12        |
| mml-miR-454     | primate     | 14     | 5      | 1.70                     | 0.71                     | 0.42               | 1               |
| mml-miR-10a     | mammal      | 44539  | 22620  | 5404.23                  | 3215.76                  | 0.60               | 0               |
| mml-miR-942     | primate     | 0      | 4      | 0.12                     | 0.57                     | 4.69               | 1               |
| mml-miR-132     | mammal      | 370    | 55     | 44.89                    | 7.82                     | 0.17               | 0               |
| mml-miR-222     | mammal      | 2958   | 806    | 358.91                   | 114.58                   | 0.32               | 0               |
| mml-miR-375     | mammal      | 363    | 789    | 44.05                    | 112.17                   | 2.55               | 1.64E-50        |
| mml-miR-432     | mammal      | 3858   | 778    | 468.12                   | 110.60                   | 0.24               | 0               |
| mml-miR-636     | primate     | 1      | 0      | 0.12                     | 0.14                     | 1.17               | 1               |
| mml-miR-181a    | mammal      | 14281  | 10196  | 1732.81                  | 1449.51                  | 0.84               | 0               |
| mml-miR-576-3p  | primate     | 5      | 1      | 0.61                     | 0.14                     | 0.23               | 1               |
| mml-miR-937     | mammal      | 1      | 1      | 0.12                     | 0.14                     | 1.17               | 1               |
| mml-miR-423-5p  | mammal      | 8170   | 31773  | 991.32                   | 4517.00                  | 4.56               | 0               |
| mml-miR-142-5p  | mammal      | 97     | 68     | 11.77                    | 9.67                     | 0.82               | 1               |
| mml-miR-886-3p  | primate     | 16     | 3      | 1.94                     | 0.43                     | 0.22               | 1               |
| mml-miR-193b    | mammal      | 403    | 465    | 48.90                    | 66.11                    | 1.35               | 0.001418194     |
| mml-miR-369-3p  | mammal      | 2192   | 936    | 265.97                   | 133.07                   | 0.50               | 0               |
| mml-miR-590-3p  | mammal      | 32     | 39     | 3.88                     | 5.54                     | 1.43               | 1               |
| mml-miR-488     | mammal      | 4      | 4      | 0.49                     | 0.57                     | 1.17               | 1               |
| mml-miR-219-5p  | mammal      | 14     | 43     | 1.70                     | 6.11                     | 3.60               | 0.000987781     |
| mml-miR-323-5p  | mammal      | 15     | 1      | 1.82                     | 0.14                     | 0.08               | 0.457705596     |
| mml-miR-532-5p  | mammal      | 3913   | 773    | 474.79                   | 109.89                   | 0.23               | 0               |
| mml-miR-149     | mammal      | 4      | 0      | 0.49                     | 0.14                     | 0.29               | 1               |
| mml-miR-146b-5p | mammal      | 2103   | 6662   | 255.17                   | 947.10                   | 3.71               | 0               |
| mml-miR-484     | mammal      | 559    | 112    | 67.83                    | 15.92                    | 0.23               | 0               |
| mml-miR-193a-5p | mammal      | 282    | 1300   | 34.22                    | 184.81                   | 5.40               | 1.48E-180       |
| mml-miR-383     | mammal      | 89     | 6      | 10.80                    | 0.85                     | 0.08               | 2.53E-12        |
| mml-miR-31      | mammal      | 256    | 1172   | 31.06                    | 166.62                   | 5.36               | 4.77E-162       |
| mml-miR-7       | mammal      | 201    | 200    | 24.39                    | 28.43                    | 1.17               | 1               |
| mml-miR-708     | mammal      | 7859   | 668    | 953.59                   | 94.97                    | 0.10               | 0               |
| mml-miR-23a     | mammal      | 15592  | 16449  | 1891.89                  | 2338.47                  | 1.24               | 2.06E-78        |
| mml-miR-187     | mammal      | 489    | 44     | 59.33                    | 6.26                     | 0.11               | 0               |
| mml-miR-218     | mammal      | 4      | 3      | 0.49                     | 0.43                     | 0.88               | 1               |
| mml-miR-487b    | mammal      | 2024   | 465    | 245.59                   | 66.11                    | 0.27               | 0               |
| mml-miR-452     | mammal      | 141    | 42     | 17.11                    | 5.97                     | 0.35               | 1.19E-07        |
| mml-miR-25      | mammal      | 38337  | 10308  | 4651.69                  | 1465.43                  | 0.32               | 0               |
| mml-miR-96      | mammal      | 32     | 220    | 3.88                     | 31.28                    | 8.06               | 3.21E-37        |

|                |         |        |        |          |          |      |             |
|----------------|---------|--------|--------|----------|----------|------|-------------|
| mml-miR-192    | mammal  | 4722   | 2703   | 572.95   | 384.27   | 0.67 | 0           |
| mml-miR-551b   | mammal  | 3      | 5      | 0.36     | 0.71     | 1.95 | 1           |
| mml-miR-214    | mammal  | 1638   | 1152   | 198.75   | 163.77   | 0.82 | 0.00015004  |
| mml-miR-411    | mammal  | 14979  | 5945   | 1817.51  | 845.17   | 0.47 | 0           |
| mml-miR-382    | mammal  | 1618   | 688    | 196.32   | 97.81    | 0.50 | 0           |
| mml-miR-496    | mammal  | 76     | 98     | 9.22     | 13.93    | 1.51 | 1           |
| mml-miR-379    | mammal  | 848    | 791    | 102.89   | 112.45   | 1.09 | 1           |
| mml-miR-320    | mammal  | 82526  | 55467  | 10013.45 | 7885.44  | 0.79 | 0           |
| mml-miR-337-3p | mammal  | 113    | 37     | 13.71    | 5.26     | 0.38 | 4.86E-05    |
| mml-miR-323-3p | mammal  | 473    | 241    | 57.39    | 34.26    | 0.60 | 1.42E-08    |
| mml-miR-584    | primate | 25     | 29     | 3.03     | 4.12     | 1.36 | 1           |
| mml-miR-210    | mammal  | 1783   | 4123   | 216.34   | 586.14   | 2.71 | 9.01E-292   |
| mml-miR-425    | mammal  | 850    | 143    | 103.14   | 20.33    | 0.20 | 0           |
| mml-miR-665    | mammal  | 2      | 0      | 0.24     | 0.14     | 0.59 | 1           |
| mml-miR-135b   | mammal  | 263    | 90     | 31.91    | 12.79    | 0.40 | 3.04E-12    |
| mml-miR-129-3p | mammal  | 8      | 23     | 0.97     | 3.27     | 3.37 | 0.271642533 |
| mml-miR-183    | mammal  | 535    | 662    | 64.92    | 94.11    | 1.45 | 2.14E-08    |
| mml-miR-455-3p | mammal  | 1605   | 731    | 194.75   | 103.92   | 0.53 | 0           |
| mml-miR-203    | mammal  | 1813   | 2679   | 219.98   | 380.86   | 1.73 | 2.00E-72    |
| mml-miR-1      | mammal  | 9494   | 21650  | 1151.97  | 3077.86  | 2.67 | 0           |
| mml-miR-543    | mammal  | 874    | 328    | 106.05   | 46.63    | 0.44 | 0           |
| mml-miR-376a   | mammal  | 283    | 33     | 34.34    | 4.69     | 0.14 | 0           |
| mml-miR-224    | mammal  | 18     | 10     | 2.18     | 1.42     | 0.65 | 1           |
| mml-miR-107    | mammal  | 73456  | 31151  | 8912.93  | 4428.57  | 0.50 | 0           |
| mml-miR-181b   | mammal  | 10051  | 8064   | 1219.56  | 1146.42  | 0.94 | 0.011315807 |
| mml-miR-577    | primate | 1      | 3      | 0.12     | 0.43     | 3.51 | 1           |
| mml-let-7c     | mammal  | 122111 | 114613 | 14816.58 | 16293.91 | 1.10 | 7.21E-118   |
| mml-miR-145    | mammal  | 5964   | 2139   | 723.65   | 304.09   | 0.42 | 0           |
| mml-miR-124a   | mammal  | 5      | 8      | 0.61     | 1.14     | 1.87 | 1           |
| mml-miR-150    | mammal  | 229    | 62     | 27.79    | 8.81     | 0.32 | 0           |
| mml-miR-542-5p | mammal  | 12     | 5      | 1.46     | 0.71     | 0.49 | 1           |
| mml-miR-182    | mammal  | 214    | 1208   | 25.97    | 171.73   | 6.61 | 3.33E-188   |
| mml-miR-148a   | mammal  | 57108  | 36541  | 6929.31  | 5194.84  | 0.75 | 0           |
| mml-miR-22     | mammal  | 7908   | 4184   | 959.53   | 594.82   | 0.62 | 0           |
| mml-miR-500    | mammal  | 27     | 8      | 3.28     | 1.14     | 0.35 | 1           |
| mml-miR-181c   | mammal  | 112    | 53     | 13.59    | 7.53     | 0.55 | 0.108182047 |
| mml-miR-346    | mammal  | 1      | 1      | 0.12     | 0.14     | 1.17 | 1           |
| mml-miR-485-5p | mammal  | 2247   | 563    | 272.64   | 80.04    | 0.29 | 0           |
| mml-miR-409-3p | mammal  | 1373   | 655    | 166.60   | 93.12    | 0.56 | 0           |
| mml-miR-521    | primate | 1      | 0      | 0.12     | 0.14     | 1.17 | 1           |
| mml-miR-376c   | mammal  | 2840   | 566    | 344.60   | 80.47    | 0.23 | 0           |
| mml-miR-877    | mammal  | 119    | 165    | 14.44    | 23.46    | 1.62 | 0.007519    |
| mml-miR-548e   | primate | 0      | 1      | 0.12     | 0.14     | 1.17 | 1           |
| mml-miR-136    | mammal  | 649    | 207    | 78.75    | 29.43    | 0.37 | 0           |
| mml-miR-654-3p | mammal  | 227    | 101    | 27.54    | 14.36    | 0.52 | 9.69E-06    |
| mml-miR-431    | mammal  | 12     | 9      | 1.46     | 1.28     | 0.88 | 1           |
| mml-miR-1224   | mammal  | 0      | 1      | 0.12     | 0.14     | 1.17 | 1           |
| mml-miR-423-3p | mammal  | 1327   | 399    | 161.01   | 56.72    | 0.35 | 0           |
| mml-miR-30b    | mammal  | 310    | 1324   | 37.61    | 188.23   | 5.00 | 7.68E-175   |
| mml-miR-101    | mammal  | 163649 | 142230 | 19856.67 | 20220.07 | 1.02 | 7.06E-05    |
| mml-miR-549    | primate | 6      | 4      | 0.73     | 0.57     | 0.78 | 1           |
| mml-miR-146a   | mammal  | 120    | 154    | 14.56    | 21.89    | 1.50 | 0.121207844 |
| mml-miR-542-3p | mammal  | 883    | 762    | 107.14   | 108.33   | 1.01 | 1           |
| mml-miR-99a    | mammal  | 106578 | 32613  | 12931.85 | 4636.41  | 0.36 | 0           |
| mml-miR-628-3p | primate | 3      | 0      | 0.36     | 0.14     | 0.39 | 1           |
| mml-miR-34a    | mammal  | 45     | 79     | 5.46     | 11.23    | 2.06 | 0.012962674 |
| mml-miR-365    | mammal  | 648    | 1040   | 78.63    | 147.85   | 1.88 | 1.83E-35    |
| mml-miR-15a    | mammal  | 3258   | 957    | 395.32   | 136.05   | 0.34 | 0           |
| mml-miR-539    | mammal  | 28     | 11     | 3.40     | 1.56     | 0.46 | 1           |
| mml-miR-296-5p | mammal  | 102    | 40     | 12.38    | 5.69     | 0.46 | 0.006247198 |
| mml-miR-148b   | mammal  | 7014   | 4058   | 851.06   | 576.90   | 0.68 | 0           |
| mml-miR-204    | mammal  | 21     | 9      | 2.55     | 1.28     | 0.50 | 1           |
| mml-miR-758    | mammal  | 3      | 0      | 0.36     | 0.14     | 0.39 | 1           |

|                 |         |        |       |          |         |      |             |
|-----------------|---------|--------|-------|----------|---------|------|-------------|
| mml-miR-501     | mammal  | 1      | 3     | 0.12     | 0.43    | 3.51 | 1           |
| mml-miR-485-3p  | mammal  | 5343   | 2920  | 648.30   | 415.12  | 0.64 | 0           |
| mml-miR-223     | mammal  | 2      | 7     | 0.24     | 1.00    | 4.10 | 1           |
| mml-miR-329     | mammal  | 37     | 20    | 4.49     | 2.84    | 0.63 | 1           |
| mml-miR-135a    | mammal  | 137    | 108   | 16.62    | 15.35   | 0.92 | 1           |
| mml-miR-503     | mammal  | 26868  | 8736  | 3260.08  | 1241.95 | 0.38 | 0           |
| mml-miR-337-5p  | mammal  | 99     | 82    | 12.01    | 11.66   | 0.97 | 1           |
| mml-miR-34c-5p  | mammal  | 1360   | 352   | 165.02   | 50.04   | 0.30 | 0           |
| mml-miR-194     | mammal  | 43     | 13    | 5.22     | 1.85    | 0.35 | 0.198109765 |
| mml-miR-371-3p  | mammal  | 3      | 0     | 0.36     | 0.14    | 0.39 | 1           |
| mml-miR-24*     | mammal  | 101    | 61    | 12.26    | 8.67    | 0.71 | 1           |
| mml-miR-495     | mammal  | 3752   | 1808  | 455.26   | 257.03  | 0.56 | 0           |
| mml-miR-106a    | mammal  | 110    | 27    | 13.35    | 3.84    | 0.29 | 2.02E-07    |
| mml-miR-219-3p  | mammal  | 7      | 2     | 0.85     | 0.28    | 0.33 | 1           |
| mml-miR-32      | mammal  | 179    | 141   | 21.72    | 20.05   | 0.92 | 1           |
| mml-miR-451     | mammal  | 667    | 399   | 80.93    | 56.72   | 0.70 | 5.37E-06    |
| mml-miR-188     | mammal  | 137    | 58    | 16.62    | 8.25    | 0.50 | 0.001606239 |
| mml-miR-199a-5p | mammal  | 6407   | 1941  | 777.41   | 275.94  | 0.35 | 0           |
| mml-let-7i      | mammal  | 16309  | 10351 | 1978.88  | 1471.55 | 0.74 | 0           |
| mml-miR-100     | mammal  | 52451  | 19083 | 6364.24  | 2712.93 | 0.43 | 0           |
| mml-miR-205     | mammal  | 83     | 8     | 10.07    | 1.14    | 0.11 | 3.26E-10    |
| mml-miR-376b    | mammal  | 838    | 193   | 101.68   | 27.44   | 0.27 | 0           |
| mml-miR-296-3p  | mammal  | 49     | 52    | 5.95     | 7.39    | 1.24 | 1           |
| mml-miR-410     | mammal  | 1043   | 495   | 126.55   | 70.37   | 0.56 | 0           |
| mml-miR-95      | primate | 474    | 1353  | 57.51    | 192.35  | 3.34 | 2.82E-125   |
| mml-miR-200a    | mammal  | 2438   | 4349  | 295.82   | 618.27  | 2.09 | 5.01E-193   |
| mml-miR-191     | mammal  | 201913 | 31454 | 24499.51 | 4471.65 | 0.18 | 0           |
| mml-miR-541     | mammal  | 744    | 1973  | 90.27    | 280.49  | 3.11 | 1.00E-167   |
| mml-miR-889     | primate | 465    | 297   | 56.42    | 42.22   | 0.75 | 0.029295459 |
| mml-miR-370     | mammal  | 190    | 43    | 23.05    | 6.11    | 0.27 | 0           |
| mml-miR-361-3p  | mammal  | 173    | 73    | 20.99    | 10.38   | 0.49 | 8.39E-05    |
| mml-miR-885-5p  | primate | 29     | 26    | 3.52     | 3.70    | 1.05 | 1           |
| mml-miR-125a-3p | mammal  | 87     | 46    | 10.56    | 6.54    | 0.62 | 1           |
| mml-miR-324-3p  | mammal  | 12     | 8     | 1.46     | 1.14    | 0.78 | 1           |
| mml-miR-18b     | mammal  | 4      | 5     | 0.49     | 0.71    | 1.46 | 1           |
| mml-miR-548b    | primate | 1      | 0     | 0.12     | 0.14    | 1.17 | 1           |
| mml-miR-373     | mammal  | 5      | 0     | 0.61     | 0.14    | 0.23 | 1           |
| mml-miR-212     | mammal  | 8      | 0     | 0.97     | 0.14    | 0.15 | 1           |
| mml-miR-544     | mammal  | 6      | 2     | 0.73     | 0.28    | 0.39 | 1           |
| mml-miR-17-3p   | mammal  | 246    | 156   | 29.85    | 22.18   | 0.74 | 1           |
| mml-miR-155     | mammal  | 389    | 95    | 47.20    | 13.51   | 0.29 | 0           |
| mml-miR-28      | mammal  | 1570   | 1348  | 190.50   | 191.64  | 1.01 | 1           |
| mml-miR-660     | primate | 1004   | 797   | 121.82   | 113.31  | 0.93 | 1           |
| mml-miR-106b    | mammal  | 1226   | 965   | 148.76   | 137.19  | 0.92 | 1           |
| mml-miR-30e     | mammal  | 229    | 274   | 27.79    | 38.95   | 1.40 | 0.024446976 |
| mml-miR-361-5p  | mammal  | 1063   | 260   | 128.98   | 36.96   | 0.29 | 0           |
| mml-miR-29c     | mammal  | 3978   | 3090  | 482.68   | 439.29  | 0.91 | 0.027636171 |
| mml-miR-129     | mammal  | 1      | 5     | 0.12     | 0.71    | 5.86 | 1           |
| mml-miR-338-5p  | mammal  | 1      | 2     | 0.12     | 0.28    | 2.34 | 1           |
| mml-miR-409-5p  | mammal  | 3732   | 444   | 452.83   | 63.12   | 0.14 | 0           |
| mml-miR-497     | mammal  | 5412   | 2130  | 656.68   | 302.81  | 0.46 | 0           |
| mml-miR-196a    | mammal  | 4      | 1     | 0.49     | 0.14    | 0.29 | 1           |
| mml-miR-26a     | mammal  | 38545  | 25633 | 4676.93  | 3644.11 | 0.78 | 0           |
| mml-miR-151-5p  | mammal  | 2378   | 1218  | 288.54   | 173.16  | 0.60 | 0           |
| mml-miR-139-5p  | mammal  | 138    | 65    | 16.74    | 9.24    | 0.55 | 0.01979482  |
| mml-miR-760     | mammal  | 1      | 2     | 0.12     | 0.28    | 2.34 | 1           |
| mml-miR-27a     | mammal  | 9870   | 23714 | 1197.60  | 3371.29 | 2.82 | 0           |
| mml-miR-299-3p  | mammal  | 4470   | 3839  | 542.38   | 545.77  | 1.01 | 1           |
| mml-miR-127     | mammal  | 16951  | 18720 | 2056.78  | 2661.32 | 1.29 | 2.82E-129   |
| mml-miR-324-5p  | mammal  | 338    | 84    | 41.01    | 11.94   | 0.29 | 0           |
| mml-miR-144     | mammal  | 28     | 36    | 3.40     | 5.12    | 1.51 | 1           |
| mml-miR-486-5p  | mammal  | 175    | 51    | 21.23    | 7.25    | 0.34 | 4.62E-10    |
| mml-miR-34c-3p  | mammal  | 13     | 9     | 1.58     | 1.28    | 0.81 | 1           |

|                 |         |        |         |           |           |      |             |
|-----------------|---------|--------|---------|-----------|-----------|------|-------------|
| mml-miR-433     | mammal  | 1970   | 1413    | 239.03    | 200.88    | 0.84 | 0.000191545 |
| mml-miR-380     | mammal  | 89     | 10      | 10.80     | 1.42      | 0.13 | 2.34E-10    |
| mml-miR-18      | mammal  | 179    | 57      | 21.72     | 8.10      | 0.37 | 4.87E-09    |
| mml-miR-371-5p  | mammal  | 82     | 58      | 9.95      | 8.25      | 0.83 | 1           |
| mml-miR-940     | primate | 60     | 9       | 7.28      | 1.28      | 0.18 | 1.24E-05    |
| mml-miR-181d    | mammal  | 2674   | 1068    | 324.45    | 151.83    | 0.47 | 0           |
| mml-miR-181a*   | mammal  | 161    | 520     | 19.54     | 73.93     | 3.78 | 1.68E-54    |
| mml-miR-19b     | mammal  | 200    | 107     | 24.27     | 15.21     | 0.63 | 0.027097825 |
| mml-miR-939     | primate | 0      | 3       | 0.12      | 0.43      | 3.51 | 1           |
| mml-miR-342-3p  | mammal  | 3843   | 515     | 466.30    | 73.21     | 0.16 | 0           |
| mml-miR-449a    | mammal  | 697    | 120     | 84.57     | 17.06     | 0.20 | 0           |
| mml-miR-138     | mammal  | 4      | 2       | 0.49      | 0.28      | 0.59 | 1           |
| mml-miR-362-3p  | mammal  | 402    | 248     | 48.78     | 35.26     | 0.72 | 0.017580721 |
| mml-miR-199a-3p | mammal  | 3E+06  | 3095605 | 314949.82 | 440085.50 | 1.40 | 0           |
| mml-miR-656     | primate | 97     | 90      | 11.77     | 12.79     | 1.09 | 1           |
| mml-miR-137     | mammal  | 1      | 1       | 0.12      | 0.14      | 1.17 | 1           |
| mml-miR-450b-3p | mammal  | 8      | 0       | 0.97      | 0.14      | 0.15 | 1           |
| mml-miR-139-3p  | mammal  | 42     | 6       | 5.10      | 0.85      | 0.17 | 0.001015278 |
| mml-miR-9       | mammal  | 28     | 3       | 3.40      | 0.43      | 0.13 | 0.015809593 |
| mml-miR-140-5p  | mammal  | 67     | 12      | 8.13      | 1.71      | 0.21 | 1.22E-05    |
| mml-let-7a      | mammal  | 1E+06  | 1262243 | 178988.74 | 179446.29 | 1.00 | 1           |
| mml-miR-197     | mammal  | 299    | 209     | 36.28     | 29.71     | 0.82 | 1           |
| mml-miR-671-3p  | mammal  | 11     | 4       | 1.33      | 0.57      | 0.43 | 1           |
| mml-miR-551a    | mammal  | 50     | 56      | 6.07      | 7.96      | 1.31 | 1           |
| mml-miR-624     | primate | 5      | 2       | 0.61      | 0.28      | 0.47 | 1           |
| mml-miR-494     | mammal  | 20     | 45      | 2.43      | 6.40      | 2.64 | 0.028839552 |
| mml-miR-92a     | mammal  | 6199   | 2974    | 752.17    | 422.80    | 0.56 | 0           |
| mml-miR-513b    | mammal  | 4      | 0       | 0.49      | 0.14      | 0.29 | 1           |
| mml-miR-450b-5p | mammal  | 56     | 30      | 6.79      | 4.26      | 0.63 | 1           |
| mml-miR-92b     | mammal  | 6015   | 6369    | 729.84    | 905.45    | 1.24 | 4.57E-31    |
| mml-miR-16      | mammal  | 15531  | 3949    | 1884.48   | 561.41    | 0.30 | 0           |
| mml-miR-424     | mammal  | 147399 | 35287   | 17884.94  | 5016.56   | 0.28 | 0           |
| mml-miR-185     | mammal  | 25071  | 39259   | 3042.04   | 5581.24   | 1.83 | 0           |
| mml-miR-125b    | mammal  | 40301  | 12825   | 4890.00   | 1823.26   | 0.37 | 0           |
| mml-miR-377     | mammal  | 62     | 26      | 7.52      | 3.70      | 0.49 | 0.618508398 |
| mml-miR-30a-3p  | mammal  | 388    | 103     | 47.08     | 14.64     | 0.31 | 0           |
| mml-miR-545     | primate | 1      | 0       | 0.12      | 0.14      | 1.17 | 1           |
| mml-miR-374b    | mammal  | 1989   | 648     | 241.34    | 92.12     | 0.38 | 0           |
| mml-miR-221     | mammal  | 31191  | 8880    | 3784.62   | 1262.42   | 0.33 | 0           |
| mml-miR-330-5p  | mammal  | 2      | 3       | 0.24      | 0.43      | 1.76 | 1           |
| mml-miR-453     | primate | 2      | 0       | 0.24      | 0.14      | 0.59 | 1           |
| mml-miR-29b     | mammal  | 1211   | 958     | 146.94    | 136.19    | 0.93 | 1           |
| mml-miR-30d     | mammal  | 4625   | 7424    | 561.18    | 1055.43   | 1.88 | 1.45E-255   |
| mml-miR-628-5p  | mammal  | 64     | 10      | 7.77      | 1.42      | 0.18 | 6.41E-06    |
| mml-let-7d      | mammal  | 435408 | 105265  | 52831.08  | 14964.96  | 0.28 | 0           |
| mml-miR-510     | primate | 13     | 2       | 1.58      | 0.28      | 0.18 | 1           |
| mml-miR-592     | mammal  | 5      | 0       | 0.61      | 0.14      | 0.23 | 1           |
| mml-miR-133b    | mammal  | 1      | 0       | 0.12      | 0.14      | 1.17 | 1           |
| mml-miR-532-3p  | mammal  | 4494   | 1026    | 545.29    | 145.86    | 0.27 | 0           |
| mml-miR-504     | mammal  | 707    | 124     | 85.79     | 17.63     | 0.21 | 0           |
| mml-miR-576-5p  | primate | 1      | 2       | 0.12      | 0.28      | 2.34 | 1           |
| mml-miR-675     | mammal  | 64     | 83      | 7.77      | 11.80     | 1.52 | 1           |
| mml-let-7g      | mammal  | 63624  | 48225   | 7719.94   | 6855.89   | 0.89 | 0           |
| mml-miR-516a-5p | primate | 5      | 7       | 0.61      | 1.00      | 1.64 | 1           |
| mml-miR-196b    | mammal  | 27050  | 3507    | 3282.16   | 498.57    | 0.15 | 0           |
| mml-miR-103     | mammal  | 84116  | 21694   | 10206.38  | 3084.12   | 0.30 | 0           |
| mml-miR-885-3p  | primate | 33     | 32      | 4.00      | 4.55      | 1.14 | 1           |
| mml-miR-363     | mammal  | 375    | 195     | 45.50     | 27.72     | 0.61 | 4.65E-06    |
| mml-miR-448     | mammal  | 7      | 1       | 0.85      | 0.14      | 0.17 | 1           |
| mml-miR-605     | primate | 20     | 2       | 2.43      | 0.28      | 0.12 | 0.164834927 |
| mml-miR-142-3p  | mammal  | 45     | 51      | 5.46      | 7.25      | 1.33 | 1           |
| mml-miR-193a-3p | mammal  | 1043   | 1331    | 126.55    | 189.22    | 1.50 | 1.96E-20    |
| mml-miR-767-5p  | mammal  | 13     | 15      | 1.58      | 2.13      | 1.35 | 1           |

|                 |         |        |        |          |          |      |             |
|-----------------|---------|--------|--------|----------|----------|------|-------------|
| mml-miR-130a    | mammal  | 6343   | 5314   | 769.64   | 755.46   | 0.98 | 1           |
| mml-miR-342-5p  | mammal  | 272    | 79     | 33.00    | 11.23    | 0.34 | 0           |
| mml-miR-140-3p  | mammal  | 21280  | 22013  | 2582.05  | 3129.47  | 1.21 | 2.68E-87    |
| mml-miR-490-3p  | mammal  | 1      | 0      | 0.12     | 0.14     | 1.17 | 1           |
| mml-miR-152     | mammal  | 6471   | 2097   | 785.17   | 298.12   | 0.38 | 0           |
| mml-miR-195     | mammal  | 2802   | 972    | 339.99   | 138.18   | 0.41 | 0           |
| mml-miR-362-5p  | mammal  | 386    | 453    | 46.84    | 64.40    | 1.38 | 0.00063412  |
| mml-miR-886-5p  | primate | 376    | 240    | 45.62    | 34.12    | 0.75 | 0.136016872 |
| mml-miR-10b     | mammal  | 49204  | 25912  | 5970.26  | 3683.77  | 0.62 | 0           |
| mml-miR-98      | mammal  | 1094   | 959    | 132.74   | 136.34   | 1.03 | 1           |
| mml-miR-338-3p  | mammal  | 9      | 9      | 1.09     | 1.28     | 1.17 | 1           |
| mml-miR-339-5p  | mammal  | 1209   | 184    | 146.70   | 26.16    | 0.18 | 0           |
| mml-miR-151-3p  | mammal  | 1217   | 850    | 147.67   | 120.84   | 0.82 | 0.002288866 |
| mml-miR-27b     | mammal  | 15126  | 19828  | 1835.34  | 2818.84  | 1.54 | 0           |
| mml-miR-34b     | mammal  | 37     | 21     | 4.49     | 2.99     | 0.66 | 1           |
| mml-miR-331-3p  | mammal  | 533    | 294    | 64.67    | 41.80    | 0.65 | 4.52E-07    |
| mml-miR-20b     | mammal  | 40     | 11     | 4.85     | 1.56     | 0.32 | 0.147562593 |
| mml-miR-126     | mammal  | 266    | 80     | 32.28    | 11.37    | 0.35 | 0           |
| mml-miR-339-3p  | mammal  | 850    | 713    | 103.14   | 101.36   | 0.98 | 1           |
| mml-miR-429     | mammal  | 4364   | 2978   | 529.51   | 423.37   | 0.80 | 0           |
| mml-miR-369-5p  | mammal  | 481    | 153    | 58.36    | 21.75    | 0.37 | 0           |
| mml-miR-125a-5p | mammal  | 18744  | 6278   | 2274.34  | 892.51   | 0.39 | 0           |
| mml-let-7e      | mammal  | 141370 | 149313 | 17153.40 | 21227.03 | 1.24 | 0           |
| mml-miR-19a     | mammal  | 6      | 7      | 0.73     | 1.00     | 1.37 | 1           |
| mml-miR-340     | mammal  | 1401   | 1103   | 169.99   | 156.81   | 0.92 | 1           |
| mml-miR-143     | mammal  | 49689  | 34814  | 6029.11  | 4949.32  | 0.82 | 0           |
| mml-miR-374a    | mammal  | 3024   | 1142   | 366.92   | 162.35   | 0.44 | 0           |
| mml-miR-99b     | mammal  | 7867   | 5768   | 954.56   | 820.01   | 0.86 | 0           |
| mml-miR-664     | mammal  | 12     | 48     | 1.46     | 6.82     | 4.69 | 2.15E-05    |
| mml-miR-30a-5p  | mammal  | 7933   | 5363   | 962.57   | 762.43   | 0.79 | 0           |
| mml-miR-502-3p  | mammal  | 945    | 851    | 114.66   | 120.98   | 1.06 | 1           |
| mml-miR-493     | mammal  | 159    | 134    | 19.29    | 19.05    | 0.99 | 1           |
| mml-miR-652     | mammal  | 136    | 268    | 16.50    | 38.10    | 2.31 | 4.56E-14    |
| mml-miR-491-5p  | mammal  | 45     | 13     | 5.46     | 1.85     | 0.34 | 0.099380334 |
| mml-miR-200c    | mammal  | 98     | 45     | 11.89    | 6.40     | 0.54 | 0.152908653 |
| mml-miR-20a     | mammal  | 262    | 49     | 31.79    | 6.97     | 0.22 | 0           |
| mml-miR-331-5p  | mammal  | 4      | 5      | 0.49     | 0.71     | 1.46 | 1           |
| mml-miR-215     | mammal  | 6      | 13     | 0.73     | 1.85     | 2.54 | 1           |
| mml-miR-216b    | mammal  | 8      | 1      | 0.97     | 0.14     | 0.15 | 1           |
| mml-miR-186     | mammal  | 3403   | 6358   | 412.91   | 903.88   | 2.19 | 0           |
| mml-miR-381     | mammal  | 43     | 15     | 5.22     | 2.13     | 0.41 | 0.665209969 |
| mml-miR-330-3p  | mammal  | 638    | 736    | 77.41    | 104.63   | 1.35 | 3.67E-06    |
| mml-miR-15b     | mammal  | 9442   | 2406   | 1145.66  | 342.05   | 0.30 | 0           |
| mml-miR-421     | mammal  | 264    | 91     | 32.03    | 12.94    | 0.40 | 3.91E-12    |
| mml-miR-93      | mammal  | 92     | 24     | 11.16    | 3.41     | 0.31 | 1.39E-05    |
| mml-miR-26b     | mammal  | 4094   | 6336   | 496.75   | 900.76   | 1.81 | 3.21E-197   |
| mml-miR-134     | mammal  | 827    | 205    | 100.35   | 29.14    | 0.29 | 0           |
| mml-miR-206     | mammal  | 1      | 0      | 0.12     | 0.14     | 1.17 | 1           |
| mml-miR-590-5p  | mammal  | 6      | 2      | 0.73     | 0.28     | 0.39 | 1           |
| mml-miR-449b    | mammal  | 411    | 94     | 49.87    | 13.36    | 0.27 | 0           |
| mml-miR-876-3p  | mammal  | 24     | 26     | 2.91     | 3.70     | 1.27 | 1           |
| mml-miR-887     | primate | 45     | 16     | 5.46     | 2.27     | 0.42 | 0.619357169 |
| mml-miR-582-3p  | mammal  | 114    | 133    | 13.83    | 18.91    | 1.37 | 1           |
| mml-miR-671-5p  | mammal  | 3      | 2      | 0.36     | 0.28     | 0.78 | 1           |
| mml-miR-21      | mammal  | 270158 | 115198 | 32780.15 | 16377.08 | 0.50 | 0           |
| mml-miR-141     | mammal  | 10     | 34     | 1.21     | 4.83     | 3.98 | 0.005291803 |
| mml-miR-598     | mammal  | 938    | 184    | 113.81   | 26.16    | 0.23 | 0           |
| mml-miR-505     | mammal  | 8      | 5      | 0.97     | 0.71     | 0.73 | 1           |
| mml-miR-24      | mammal  | 3897   | 1784   | 472.85   | 253.62   | 0.54 | 0           |
| mml-miR-190b    | mammal  | 1      | 6      | 0.12     | 0.85     | 7.03 | 1           |
| mml-miR-154     | mammal  | 544    | 212    | 66.01    | 30.14    | 0.46 | 0           |
| mml-miR-33b     | mammal  | 119    | 24     | 14.44    | 3.41     | 0.24 | 7.18E-10    |
| mml-miR-184     | mammal  | 1      | 4      | 0.12     | 0.57     | 4.69 | 1           |

|                |         |       |       |         |             |      |             |
|----------------|---------|-------|-------|---------|-------------|------|-------------|
| mml-miR-29a    | mammal  | 20760 | 58071 | 2518.95 | 8255.64     | 3.28 | 0           |
| mml-miR-491-3p | mammal  | 5     | 0     | 0.61    | 0.14        | 0.23 | 1           |
| mml-miR-522    | primate | 1     | 0     | 0.12    | 0.14        | 1.17 | 1           |
| mml-miR-876-5p | mammal  | 27    | 46    | 3.28    | 6.54        | 2.00 | 0.592488395 |
| mml-miR-378    | mammal  | 4686  | 1339  | 568.58  | 190.36      | 0.33 | 0           |
| mml-miR-122a   | mammal  | 4     | 21    | 0.49    | 2.99        | 6.15 | 0.022916521 |
| mml-miR-513a   | primate | 4     | 0     | 0.49    | 0.14        | 0.29 | 1           |
| mml-miR-301a   | mammal  | 51    | 52    | 6.19    | 7.39        | 1.19 | 1           |
| mml-miR-211    | mammal  | 6     | 0     | 0.73    | 0.14        | 0.20 | 1           |
| mml-miR-499-5p | mammal  | 966   | 610   | 117.21  | 86.72       | 0.74 | 1.62E-06    |
| mml-miR-372    | primate | 166   | 40    | 20.14   | 5.69        | 0.28 | 5.65E-12    |
| mml-miR-499-3p | mammal  | 0     | 1     | 0.12    | 0.14        | 1.17 | 1           |
| mml-miR-335    | mammal  | 6533  | 1834  | 792.69  | 260.73      | 0.33 | 0           |
| mml-miR-615-3p | mammal  | 1     | 0     | 0.12    | 0.142164618 | 1.17 | 1           |

Supplemental Table 3

| Representative tag   | Monkey gene         | D15<br>(normalized, rpm) | D21<br>(normalized, rpm) | Folds<br>(D21/D15) | Adjusted<br>pvalue | Gene name |
|----------------------|---------------------|--------------------------|--------------------------|--------------------|--------------------|-----------|
| GATCCTTCAGACACGTGCTT | ENSMMUG00000010979  | 100.97                   | 0.20                     | 0.00               | 6.69E-110          | S100A4    |
| GATCAATGGACTCCTGGTGG | ENSMMUG00000002807  | 39.30                    | 0.20                     | 0.00               | 1.11E-41           | NTHL1     |
| GATCATTTTGGTTCGTGAGC | ENSMMUG00000017079  | 16.53                    | 0.20                     | 0.01               | 3.87E-16           | GLRX5     |
| GATCAGCCTCCGCCATTCCA | ENSMMUG00000007878  | 14.31                    | 0.20                     | 0.01               | 1.22E-13           | PTPN1     |
| GATCTTCTCTTCCCAACACC | ENSMMUG00000007544  | 13.30                    | 0.20                     | 0.01               | 7.57E-12           | TROAP     |
| GATCTTTTTCAAATGGCTT  | ENSMMUG00000000534  | 12.90                    | 0.20                     | 0.02               | 2.16E-11           | KIAA1024  |
| GATCCCCCTTACTTCACTG  | ENSMMUG00000000329  | 11.29                    | 0.20                     | 0.02               | 3.18E-10           | SPRYD3    |
| GATCATAAATTAATCAAGAT | ENSMMUG00000007081  | 21.97                    | 0.39                     | 0.02               | 5.83E-21           | SGMS1     |
| GATCTGAATCCCCCAGAGT  | ENSMMUG00000003115  | 51.19                    | 0.98                     | 0.02               | 9.30E-52           | NLRP2     |
| GATCCCACACTTCAGGCAGA | ENSMMUG000000023190 | 9.88                     | 0.20                     | 0.02               | 1.26E-08           | TCIRG1    |
| GATCCCGTGGTCTTCCGCC  | ENSMMUG000000020618 | 9.47                     | 0.20                     | 0.02               | 3.62E-08           | ECSIT     |
| GATCCAGGAATAAACCTTGT | ENSMMUG00000000488  | 17.53                    | 0.39                     | 0.02               | 5.57E-16           | CLDN14    |
| GATCATCAGCGCTAAGGCAG | ENSMMUG000000016921 | 42.52                    | 0.98                     | 0.02               | 4.41E-42           | CYTL1     |
| GATCAATTTGAAGTCCCTGT | ENSMMUG000000008761 | 8.46                     | 0.20                     | 0.02               | 2.28E-06           | EXO1      |
| GATCTAGAGCAAGTTAGCAC | ENSMMUG00000019290  | 8.26                     | 0.20                     | 0.02               | 3.86E-06           | STK32A    |
| GATCCAAGAACTCTCTCTCC | ENSMMUG000000023392 | 7.86                     | 0.20                     | 0.02               | 1.11E-05           | P2RX5     |
| GATCTGAGTGATTGAGATTC | ENSMMUG000000005853 | 13.91                    | 0.39                     | 0.03               | 6.73E-12           | GSG2      |
| GATCTTATGTACATACCCAT | ENSMMUG00000000902  | 41.72                    | 1.17                     | 0.03               | 1.45E-40           | PLA1A     |
| GATCCAGTTTAGGGTCAGGA | ENSMMUG000000021168 | 20.76                    | 0.59                     | 0.03               | 5.58E-19           | UNC5CL    |
| GATCTTTTCTCACTTCAATC | ENSMMUG000000009527 | 6.45                     | 0.20                     | 0.03               | 0.000452992        | CLC       |
| GATCGCCAGTCTAGTACAGT | ENSMMUG000000016018 | 12.70                    | 0.39                     | 0.03               | 1.55E-10           | ESCO2     |
| GATCAGAAGTTCGCATATAT | ENSMMUG00000001103  | 11.89                    | 0.39                     | 0.03               | 1.26E-09           | GPR87     |
| GATCCCAATCAGAGGGGTGG | ENSMMUG00000007973  | 10.28                    | 0.39                     | 0.04               | 8.32E-08           | POLQ      |
| GATCTTTCCAGAGGTCCAAG | ENSMMUG000000001936 | 9.88                     | 0.39                     | 0.04               | 2.38E-07           | MAL       |
| GATCTCAGCTCCCATTCCC  | ENSMMUG000000015851 | 13.30                    | 0.59                     | 0.04               | 1.30E-10           | SFRP2     |
| GATCTCTCGTGATTGATAAG | ENSMMUG000000018272 | 25.80                    | 1.17                     | 0.05               | 8.28E-23           | GRIA2     |
| GATCTCTCCAAGCTTCAAC  | ENSMMUG000000019642 | 41.92                    | 1.95                     | 0.05               | 2.15E-38           | PDZK1     |
| GATCCATGAGTCTGGCCGC  | ENSMMUG000000018524 | 234.19                   | 11.12                    | 0.05               | 7.82E-224          | GSTP1     |
| GATCGACCTGGTGGCCATCC | ENSMMUG00000000683  | 7.26                     | 0.39                     | 0.05               | 0.00022016         | KCNG1     |
| GATCCCCTACCCACGTGTCC | ENSMMUG000000019496 | 57.44                    | 3.12                     | 0.05               | 3.99E-52           | SMPD3     |
| GATCAATATCTTTTCTTCT  | ENSMMUG000000013666 | 21.16                    | 1.17                     | 0.06               | 1.20E-17           | CPNE8     |
| GATCCCCCTGGAGAGCTGCA | ENSMMUG000000018153 | 7.05                     | 0.39                     | 0.06               | 0.000372751        | GOLGA7B   |
| GATCCCAGCAGGCTGGACGA | ENSMMUG000000014542 | 9.88                     | 0.59                     | 0.06               | 9.23E-07           | CHAC1     |
| GATCCTCAGCTCACGGCGCT | ENSMMUG000000001511 | 46.35                    | 2.93                     | 0.06               | 1.90E-40           | KIF20A    |
| GATCAGCCCAGGCCTGGCCT | ENSMMUG000000028951 | 9.07                     | 0.59                     | 0.06               | 7.43E-06           | THEG      |
| GATCCCAGAACCCCCTGGA  | ENSMMUG000000021556 | 242.65                   | 15.99                    | 0.07               | 5.15E-219          | FSTL3     |
| GATCCTTGGCAGTTCCTGGC | ENSMMUG00000001029  | 24.79                    | 1.76                     | 0.07               | 5.52E-20           | ANO10     |
| GATCGTTTTTATAACCATGG | ENSMMUG000000009274 | 419.60                   | 31.01                    | 0.07               | 0                  | CLDN11    |
| GATCATGAAGTTCAGAACC  | ENSMMUG000000018070 | 33.46                    | 2.54                     | 0.08               | 2.39E-27           | NCAPG     |
| GATCTTTTGGCCCCATTTGT | ENSMMUG000000002057 | 66.51                    | 5.07                     | 0.08               | 1.45E-56           | RRM2      |
| GATCAGGACCGACAACCT   | ENSMMUG000000015260 | 45.95                    | 3.51                     | 0.08               | 2.33E-38           | PRSS12    |
| GATCCCAGCTTTTTTCCCC  | ENSMMUG000000002712 | 7.66                     | 0.59                     | 0.08               | 0.00028621         | SCN2A     |
| GATCTCAAAGTTAAATAAAT | ENSMMUG000000000989 | 9.47                     | 0.78                     | 0.08               | 9.42E-06           | IL1F9     |
| GATCCCCCTCTTGCACAGC  | ENSMMUG000000000290 | 18.94                    | 1.56                     | 0.08               | 4.40E-14           | RBP1      |
| GATCTATCTTCAGAACGGAC | ENSMMUG000000021930 | 27.81                    | 2.34                     | 0.08               | 1.08E-21           | SGOL2     |
| GATCTTCTGTCTGCCTCTG  | ENSMMUG000000002621 | 32.04                    | 2.73                     | 0.09               | 2.88E-25           | IQGAP3    |
| GATCCTCGCAAGCGGTATG  | ENSMMUG000000006775 | 9.07                     | 0.78                     | 0.09               | 2.65E-05           | PENK      |
| GATCTAAGTTGCCTACCTTG | ENSMMUG000000013795 | 50.59                    | 4.49                     | 0.09               | 8.99E-41           | UBE2T     |
| GATCGCTTTGATTTAAAGT  | ENSMMUG000000003782 | 36.88                    | 3.32                     | 0.09               | 5.65E-29           | MELK      |
| GATCTTTAAATTTTATATA  | ENSMMUG000000012330 | 31.84                    | 2.93                     | 0.09               | 1.60E-24           | ADAMTS14  |
| GATCATTTTCTTCTTAGATT | ENSMMUG000000023151 | 12.70                    | 1.17                     | 0.09               | 2.92E-08           | KIF15     |
| GATCATAGTCCAACAGGGCC | ENSMMUG000000019042 | 16.93                    | 1.56                     | 0.09               | 7.23E-12           | WSCD2     |
| GATCTCTCATCTTTTGACTA | ENSMMUG000000006663 | 20.96                    | 1.95                     | 0.09               | 3.06E-15           | DEC1      |
| GATCTGTGCATGGTTTTGT  | ENSMMUG000000004869 | 69.53                    | 6.63                     | 0.10               | 1.17E-55           | NPTXR     |
| GATCGGTGGTGTGCCTGCA  | ENSMMUG000000011832 | 8.06                     | 0.78                     | 0.10               | 0.000349916        | E2F2      |
| GATCCTTGACGAGGAGAGAG | ENSMMUG000000023077 | 114.68                   | 11.12                    | 0.10               | 9.58E-93           | PTTG1     |
| GATCGATTGCAATAAATGTT | ENSMMUG000000021690 | 88.68                    | 8.78                     | 0.10               | 9.25E-71           | C19orf12  |
| GATCTGTATCAAGATAAAGA | ENSMMUG000000012323 | 66.10                    | 6.63                     | 0.10               | 5.93E-52           | CDKN3     |
| GATCCTTATGCATAAGTGTC | ENSMMUG000000021221 | 15.52                    | 1.56                     | 0.10               | 2.53E-10           | HJURP     |
| GATCTGACCTCCCGGGTGCC | ENSMMUG000000011191 | 48.17                    | 4.88                     | 0.10               | 4.02E-37           | TACC3     |
| GATCAGTTAGTGTAATCAT  | ENSMMUG000000000245 | 69.33                    | 7.02                     | 0.10               | 2.00E-54           | ASPM      |
| GATCTTGCTCCCCACTGAT  | ENSMMUG000000029628 | 24.79                    | 2.54                     | 0.10               | 7.10E-18           | CCNB2     |
| GATCGCACAGAAATCACTGT | ENSMMUG000000019533 | 13.30                    | 1.37                     | 0.10               | 2.08E-08           | KIAA1210  |
| GATCTCTAAGAAGAGGGTCT | ENSMMUG000000005127 | 64.29                    | 6.63                     | 0.10               | 5.37E-50           | PLXNA4    |
| GATCCCTACTGTTTTCCGTT | ENSMMUG000000021929 | 61.67                    | 6.44                     | 0.10               | 1.13E-47           | KIF2C     |
| GATCATTGAAATTCATTTT  | ENSMMUG000000012705 | 14.91                    | 1.56                     | 0.10               | 1.16E-09           | UHRF1     |



|                       |                     |         |        |      |             |          |
|-----------------------|---------------------|---------|--------|------|-------------|----------|
| GATCTCAACTCGTGCCACTA  | ENSMMUG00000006027  | 12.90   | 1.37   | 0.11 | 5.74E-08    | TTYH1    |
| GATCATTTGTGTGATGAGATG | ENSMMUG00000002746  | 14.31   | 1.56   | 0.11 | 5.29E-09    | TRAT1    |
| GATCACACAAATGATGAAAA  | ENSMMUG000000029603 | 23.18   | 2.54   | 0.11 | 3.96E-16    | KIAA0101 |
| GATCCAGCAGGGAACAGGAC  | ENSMMUG00000016727  | 10.68   | 1.17   | 0.11 | 4.79E-06    | CDH16    |
| GATCTTAGGTCTGCCCCCC   | ENSMMUG00000004706  | 10.68   | 1.17   | 0.11 | 4.79E-06    | IGSF9    |
| GATCAATGAAATTTGCCCTC  | ENSMMUG00000002473  | 12.29   | 1.37   | 0.11 | 2.63E-07    | AKR1CL2  |
| GATCACATGCTTAGTCGTTT  | ENSMMUG00000018720  | 61.07   | 7.02   | 0.11 | 1.52E-45    | CKAP2    |
| GATCTGTATCTCTTGTCTGA  | ENSMMUG00000003855  | 15.12   | 1.76   | 0.12 | 2.21E-09    | ZNF385B  |
| GATCATGTATATATATCCAT  | ENSMMUG00000018952  | 21.56   | 2.54   | 0.12 | 2.18E-14    | NDC80    |
| GATCGACTCTATCAATATTG  | ENSMMUG00000014307  | 11.29   | 1.37   | 0.12 | 3.28E-06    | MSTN     |
| GATCACCCATGGCTAGACGC  | ENSMMUG00000011333  | 30.43   | 3.71   | 0.12 | 5.30E-21    | MBP      |
| GATCTTCAAACAAGCATCAG  | ENSMMUG00000000332  | 174.94  | 21.65  | 0.12 | 8.89E-131   | TGFBI    |
| GATCTGCTTGCCAGAGTCT   | ENSMMUG00000019385  | 51.39   | 6.44   | 0.13 | 1.14E-36    | FOXM1    |
| GATCCCAGTGGAGGGGTCTC  | ENSMMUG00000014641  | 13.91   | 1.76   | 0.13 | 4.47E-08    | IGLL1    |
| GATCAAGAAAGACGAAAAGC  | ENSMMUG00000005390  | 44.34   | 5.66   | 0.13 | 4.58E-31    | MKI67    |
| GATCATTTATGTATGATGATG | ENSMMUG000000021186 | 34.66   | 4.49   | 0.13 | 1.29E-23    | ANLN     |
| GATCATCACTGCAAACCTCT  | ENSMMUG00000018767  | 23.58   | 3.12   | 0.13 | 4.09E-15    | CDCA5    |
| GATCCAGAAAAATGCAAGCA  | ENSMMUG00000004755  | 9.88    | 1.37   | 0.14 | 0.000110051 | CDC6     |
| GATCCATTGCCCCAAGGGG   | ENSMMUG000000004154 | 20.96   | 2.93   | 0.14 | 8.51E-13    | TCEAL5   |
| GATCAAATTAATAAAGAAG   | ENSMMUG000000007996 | 17.94   | 2.54   | 0.14 | 1.64E-10    | ZNF367   |
| GATCTCTTCTACATTAGC    | ENSMMUG000000005317 | 177.35  | 25.16  | 0.14 | 5.34E-125   | ADAM28   |
| GATCCGATTTACCTTGAC    | ENSMMUG00000018956  | 16.32   | 2.34   | 0.14 | 2.94E-09    | CAMK2N2  |
| GATCCCATGGCCGAGGGCT   | ENSMMUG000000022864 | 16.32   | 2.34   | 0.14 | 2.94E-09    | DDX11L8  |
| GATCTGCTTATAAATAAACT  | ENSMMUG000000004749 | 13.50   | 1.95   | 0.14 | 3.55E-07    | PPARGC1B |
| GATCACTGAAGAAGAGCCTT  | ENSMMUG00000017298  | 20.15   | 2.93   | 0.15 | 6.06E-12    | TRIM59   |
| GATCTACTACTGCAATGGCC  | ENSMMUG00000011905  | 18.74   | 2.73   | 0.15 | 6.59E-11    | TNFRSF21 |
| GATCCGAGGCTCATGCTTGC  | ENSMMUG00000013712  | 35.27   | 5.27   | 0.15 | 2.02E-22    | CIZ1     |
| GATCACTGTGAAGGTGTTT   | ENSMMUG000000020418 | 14.31   | 2.15   | 0.15 | 1.41E-07    | DGKB     |
| GATCCCTTTGCTGTGAGGGT  | ENSMMUG00000000966  | 57.24   | 8.58   | 0.15 | 8.82E-38    | TPX2     |
| GATCAACAATAAACATAAGA  | ENSMMUG00000015189  | 21.56   | 3.32   | 0.15 | 1.57E-12    | RAD51AP1 |
| GATCTGACCTCCGTCCTCTG  | ENSMMUG000000029681 | 24.79   | 3.90   | 0.16 | 1.41E-14    | PGA3     |
| GATCACTCCAGCTGCTGCT   | ENSMMUG00000003247  | 11.89   | 1.95   | 0.16 | 1.79E-05    | ASGR1    |
| GATCTGTTCTTTTTTTTATT  | ENSMMUG00000016596  | 105.81  | 17.36  | 0.16 | 1.99E-68    | OLFM2    |
| GATCACCCATTCCGGGTTC   | ENSMMUG000000002295 | 15.32   | 2.54   | 0.17 | 9.39E-08    | CRABP2   |
| GATCAGTGGGACTGCTTGAT  | ENSMMUG00000019254  | 26.60   | 4.49   | 0.17 | 3.66E-15    | PLA2G7   |
| GATCCCTAGTTGGGCAGAA   | ENSMMUG000000009101 | 20.56   | 3.51   | 0.17 | 4.76E-11    | DERL3    |
| GATCAAAAACCGTAGATGAC  | ENSMMUG000000003720 | 22.77   | 3.90   | 0.17 | 1.73E-12    | KIAA1644 |
| GATCTAAATATGTATTTTAT  | ENSMMUG00000018840  | 29.22   | 5.07   | 0.17 | 1.37E-16    | SCN3A    |
| GATCATGTAGTAAACGTAGG  | ENSMMUG00000011040  | 28.82   | 5.07   | 0.18 | 3.54E-16    | CRISPLD1 |
| GATCTGTGCTTTTCTTTT    | ENSMMUG00000010729  | 28.62   | 5.07   | 0.18 | 5.69E-16    | RGS7     |
| GATCTGGTTGCCGGTTACCT  | ENSMMUG00000000862  | 86.26   | 15.41  | 0.18 | 1.12E-52    | GNG4     |
| GATCAGGAGCTGCTCCTGCC  | ENSMMUG000000007556 | 13.10   | 2.34   | 0.18 | 7.06E-06    | KNTC1    |
| GATCTACTGAAATTAGCACT  | ENSMMUG00000016019  | 37.89   | 6.83   | 0.18 | 1.06E-21    | PBK      |
| GATCTGTCTAGTTCCCATCC  | ENSMMUG00000010582  | 42.12   | 7.61   | 0.18 | 2.34E-24    | CDCA2    |
| GATCTGTTTCTATGAAAAAC  | ENSMMUG00000002330  | 69.93   | 12.68  | 0.18 | 6.88E-42    | ENOX1    |
| GATCTCCCTCTGGGCCAC    | ENSMMUG00000005854  | 10.68   | 1.95   | 0.18 | 0.000327241 | CPNE5    |
| GATCTTTAATGATGTACAAC  | ENSMMUG00000018726  | 21.36   | 3.90   | 0.18 | 4.84E-11    | KIF24    |
| GATCATTATTAATTTGAAAA  | ENSMMUG00000016292  | 12.70   | 2.34   | 0.18 | 1.84E-05    | PHACTR3  |
| GATCCCCAGGGAGATGCTGA  | ENSMMUG000000020973 | 17.94   | 3.32   | 0.18 | 8.94E-09    | PTCH2    |
| GATCTAAATAAGTGTGTCAA  | ENSMMUG000000030704 | 13.50   | 2.54   | 0.19 | 7.05E-06    | DIAPH3   |
| GATCTTTCTGTAGTATTTAC  | ENSMMUG00000015934  | 34.26   | 6.44   | 0.19 | 7.71E-19    | CENPA    |
| GATCCTCCAGGCAGATGGC   | ENSMMUG00000013990  | 40.71   | 7.80   | 0.19 | 1.58E-22    | C6orf108 |
| GATCCCTCTCTTCTCGGAG   | ENSMMUG00000013717  | 78.20   | 15.02  | 0.19 | 2.27E-45    | DNM1     |
| GATCAGGAGAAGTCCCGCA   | ENSMMUG000000031415 | 3330.42 | 639.86 | 0.19 | 0           | APOD     |
| GATCACCTGGGCTGGGCTCG  | ENSMMUG00000015448  | 93.31   | 17.94  | 0.19 | 1.57E-54    | PARVB    |
| GATCTGCTTATAATTTAACT  | ENSMMUG000000005668 | 222.90  | 43.10  | 0.19 | 8.83E-133   | KMO      |
| GATCACACATCCCCAAAGA   | ENSMMUG000000006231 | 67.31   | 13.07  | 0.19 | 1.88E-38    | FAM107A  |
| GATCCAAGGGACTCAGTCCT  | ENSMMUG000000011192 | 199.32  | 39.20  | 0.20 | 3.45E-117   | LMNB2    |
| GATCCTGGGCTTCCCCATCT  | ENSMMUG00000014740  | 10.88   | 2.15   | 0.20 | 0.000521179 | TRIP13   |
| GATCAGTGTGCCACCTTG    | ENSMMUG00000014699  | 27.01   | 5.46   | 0.20 | 1.55E-13    | COL7A1   |
| GATCAGTTTCTATTACTTTA  | ENSMMUG000000004579 | 13.50   | 2.73   | 0.20 | 1.78E-05    | RAD51    |
| GATCAGCACTTACCACAGC   | ENSMMUG00000018142  | 61.47   | 12.48  | 0.20 | 8.19E-34    | CCNB1    |
| GATCCAAGGAGCTCCTGGGT  | ENSMMUG000000006985 | 46.96   | 9.56   | 0.20 | 3.13E-25    | ALPPL2   |
| GATCCAGGCAGCCACTGGGA  | ENSMMUG000000004063 | 25.80   | 5.27   | 0.20 | 1.01E-12    | ARHGAP22 |
| GATCTGTGACTTCCCTATG   | ENSMMUG00000015588  | 18.14   | 3.71   | 0.20 | 3.52E-08    | RECQL4   |
| GATCTGAGCTTAGAGCTTTA  | ENSMMUG00000014639  | 15.12   | 3.12   | 0.21 | 2.57E-06    | HLA-J    |
| GATCTTTAATAGTGTGAGT   | ENSMMUG000000021689 | 15.12   | 3.12   | 0.21 | 2.57E-06    | RACGAP1  |
| GATCACAGGGTCCAGCCCC   | ENSMMUG00000007268  | 23.58   | 4.88   | 0.21 | 2.76E-11    | THOP1    |
| GATCTATGCATTTATTAAT   | ENSMMUG00000013960  | 107.42  | 22.23  | 0.21 | 5.71E-60    | SLC24A4  |
| GATCCAATAAACTTGGAAC   | ENSMMUG00000017923  | 507.88  | 105.51 | 0.21 | 1.22E-290   | GNG8     |
| GATCTCAAAGGAGTCTGAAA  | ENSMMUG00000007047  | 672.53  | 140.80 | 0.21 | 0           | CYB5R1   |

|                       |                    |         |        |      |             |          |
|-----------------------|--------------------|---------|--------|------|-------------|----------|
| GATCTTACCTCCTGATAAAT  | ENSMMUG00000017484 | 18.54   | 3.90   | 0.21 | 3.40E-08    | SMAGP    |
| GATCCACATTCTTGGGCTGA  | ENSMMUG00000023089 | 78.40   | 16.58  | 0.21 | 1.78E-42    | PHGDH    |
| GATCCCACTGCTTCTCAGAC  | ENSMMUG00000007432 | 14.71   | 3.12   | 0.21 | 6.51E-06    | FAM70B   |
| GATCTACATTAGGAAGAGTG  | ENSMMUG00000011476 | 61.27   | 13.26  | 0.22 | 4.24E-32    | SNX5     |
| GATCCAGGCAAAACACTTC   | ENSMMUG00000019262 | 71.34   | 15.60  | 0.22 | 1.85E-37    | CACNA1D  |
| GATCTCTATCGCCACGGCAC  | ENSMMUG00000002424 | 1072.59 | 236.56 | 0.22 | 0           | FBLN1    |
| GATCAGTTAAGGAGCTGTGC  | ENSMMUG00000000070 | 29.83   | 6.63   | 0.22 | 4.78E-14    | AURKA    |
| GATCTTTTTTTTAACTGT    | ENSMMUG00000011810 | 65.70   | 14.63  | 0.22 | 8.00E-34    | FAT4     |
| GATCCAGCAAAAGACTGGGAG | ENSMMUG00000012914 | 49.78   | 11.12  | 0.22 | 5.46E-25    | PCNT     |
| GATCCTTACCTAAATGAAAT  | ENSMMUG00000016302 | 62.48   | 14.04  | 0.22 | 8.45E-32    | L3MBTL4  |
| GATCTGGGCAGTGGTTTCAC  | ENSMMUG00000019276 | 18.14   | 4.10   | 0.23 | 2.02E-07    | NR2E3    |
| GATCTGGCAATGACTTTTTG  | ENSMMUG00000019736 | 82.83   | 18.72  | 0.23 | 1.02E-42    | SHANK2   |
| GATCGACACATTCGCATCTG  | ENSMMUG00000003148 | 41.92   | 9.56   | 0.23 | 2.68E-20    | MPL      |
| GATCGGGCCTAGCCCAGAAC  | ENSMMUG00000011264 | 195.09  | 44.85  | 0.23 | 3.28E-102   | MFSD2    |
| GATCCTTGGCTTTCAGGATT  | ENSMMUG00000020733 | 33.86   | 7.80   | 0.23 | 9.06E-16    | CMYA5    |
| GATCAGATGTGGTCAGACTC  | ENSMMUG00000016476 | 15.92   | 3.71   | 0.23 | 5.49E-06    | TRAIIP   |
| GATCCGGCCACCCCTGATG   | ENSMMUG00000011568 | 17.53   | 4.10   | 0.23 | 7.86E-07    | RAD54L   |
| GATCTGAACCTGGACCCTGG  | ENSMMUG00000016732 | 89.28   | 20.87  | 0.23 | 5.88E-45    | ANKRD35  |
| GATCAGCGCTGAGATAGAGT  | ENSMMUG00000017127 | 33.66   | 8.00   | 0.24 | 3.23E-15    | CHST11   |
| GATCACCATTATACTGCCTT  | ENSMMUG00000019047 | 14.71   | 3.51   | 0.24 | 3.59E-05    | SPARCL1  |
| GATCTATGAGAGTGAACCTCT | ENSMMUG00000006997 | 271.88  | 65.14  | 0.24 | 1.67E-138   | TXNDC16  |
| GATCCAAAGATGGCCCTCT   | ENSMMUG00000011688 | 46.35   | 11.12  | 0.24 | 1.07E-21    | C1orf113 |
| GATCGTTTTTGAAGCAGAAC  | ENSMMUG00000022615 | 20.15   | 4.88   | 0.24 | 6.21E-08    | EGFL6    |
| GATCCTTGCTGGGAAACA    | ENSMMUG00000022058 | 134.02  | 32.76  | 0.24 | 4.98E-66    | GLI1     |
| GATCGCTCTACTGCCCTCCA  | ENSMMUG00000008364 | 17.53   | 4.29   | 0.24 | 1.79E-06    | ZNF771   |
| GATCAGGAGCAGCGGCCCG   | ENSMMUG00000009047 | 20.56   | 5.07   | 0.25 | 5.73E-08    | MXD3     |
| GATCGGGGGAGCAAGAAATCA | ENSMMUG00000012485 | 55.83   | 14.04  | 0.25 | 1.83E-25    | WDR51A   |
| GATCCTGAACCTGTTCCCTTA | ENSMMUG00000002997 | 23.18   | 5.85   | 0.25 | 4.47E-09    | AURKB    |
| GATCTCTTTTATCTTTGTT   | ENSMMUG00000008125 | 93.92   | 23.79  | 0.25 | 3.85E-44    | IRF8     |
| GATCCCGTGTAGCCTTCGTT  | ENSMMUG00000021996 | 80.01   | 20.28  | 0.25 | 3.04E-37    | ODZ4     |
| GATCACATATTCTAGTGTA   | ENSMMUG00000022788 | 75.38   | 19.11  | 0.25 | 6.08E-35    | TCF7     |
| GATCCAAGTCCCTGCCTGG   | ENSMMUG00000014533 | 129.19  | 32.76  | 0.25 | 1.68E-61    | TMEM132A |
| GATCATAGTCTTAGGAGTTC  | ENSMMUG00000008934 | 802.53  | 203.80 | 0.25 | 0           | MARCKS   |
| GATCCCCGCTGGCCAGGAG   | ENSMMUG00000000835 | 40.51   | 10.34  | 0.26 | 1.48E-17    | MSLN     |
| GATCGAAGCCAAAGCAGCTC  | ENSMMUG00000010682 | 18.34   | 4.68   | 0.26 | 1.50E-06    | FBN2     |
| GATCCGAGCGAGCTGTCAGT  | ENSMMUG00000021942 | 358.94  | 91.66  | 0.26 | 1.34E-173   | ANKH     |
| GATCAAAGGCTACAAGGACA  | ENSMMUG00000022251 | 12.90   | 3.32   | 0.26 | 0.000890882 | TGM7     |
| GATCGTTTCCTTAAACTAGTG | ENSMMUG00000016072 | 15.92   | 4.10   | 0.26 | 2.78E-05    | C3orf52  |
| GATCTCACAAAAAATCATGA  | ENSMMUG00000018360 | 36.28   | 9.36   | 0.26 | 2.77E-15    | RCN1     |
| GATCTCCTCCACCTTCTGTC  | ENSMMUG00000001049 | 85.05   | 22.04  | 0.26 | 6.50E-39    | SLC15A2  |
| GATCTTGCAAACCTGCAGAT  | ENSMMUG00000023566 | 22.57   | 5.85   | 0.26 | 1.66E-08    | DYRK3    |
| GATCACCTTTTAAATAAGAA  | ENSMMUG00000011564 | 16.32   | 4.29   | 0.26 | 2.52E-05    | TMC3     |
| GATCTGCCAGCATTTCTTTT  | ENSMMUG00000014377 | 18.54   | 4.88   | 0.26 | 2.11E-06    | SAAL1    |
| GATCCTTATAGAGTAAATGA  | ENSMMUG00000023398 | 16.93   | 4.49   | 0.26 | 1.47E-05    | COL16A1  |
| GATCGCACCTGCTGACTTT   | ENSMMUG00000023216 | 21.97   | 5.85   | 0.27 | 6.11E-08    | ASTN1    |
| GATCTGAAGAAAAGGCTTCA  | ENSMMUG00000005216 | 13.91   | 3.71   | 0.27 | 0.000470232 | NEK2     |
| GATCCGGCAGCGAAGCCGGC  | ENSMMUG00000006009 | 48.97   | 13.07  | 0.27 | 9.16E-21    | CDH24    |
| GATCTGGCAAGCTGCACAG   | ENSMMUG00000019439 | 995.60  | 266.20 | 0.27 | 0           | NKD2     |
| GATCTGTGATTCTGTAGCC   | ENSMMUG00000004938 | 16.73   | 4.49   | 0.27 | 2.27E-05    | PITRM1   |
| GATCTGGAAGTCAACCCTCT  | ENSMMUG00000009268 | 14.51   | 3.90   | 0.27 | 0.000273792 | KIF5C    |
| GATCCCTAGTCCCATGTTG   | ENSMMUG00000017936 | 101.37  | 27.30  | 0.27 | 4.39E-45    | SPEG     |
| GATCTATGGCCTCTGGTGCT  | ENSMMUG00000023383 | 318.23  | 86.39  | 0.27 | 4.52E-145   | TRIB2    |
| GATCTTTACAAAAAGACACT  | ENSMMUG00000000809 | 20.76   | 5.66   | 0.27 | 3.80E-07    | PLP1     |
| GATCATAACCTGGTGAACCC  | ENSMMUG00000013268 | 110.85  | 30.81  | 0.28 | 6.14E-48    | BBS2     |
| GATCTAAGAGCCAAGCGATT  | ENSMMUG00000018588 | 58.04   | 16.19  | 0.28 | 6.66E-24    | C17orf76 |
| GATCCAGCTGAGCCCCGAGG  | ENSMMUG00000008136 | 16.73   | 4.68   | 0.28 | 4.82E-05    | GTSE1    |
| GATCTGTACCTCTCTCTTT   | ENSMMUG00000004420 | 102.78  | 28.86  | 0.28 | 8.11E-44    | INCENP   |
| GATCCTGGTCCCGCCAGGC   | ENSMMUG00000000524 | 22.17   | 6.24   | 0.28 | 1.77E-07    | SCNN1B   |
| GATCTAATCTAAGTATTATT  | ENSMMUG00000013989 | 48.97   | 13.85  | 0.28 | 1.75E-19    | C4orf31  |
| GATCTTTAAAGATGTGCTAA  | ENSMMUG00000018574 | 225.32  | 63.77  | 0.28 | 6.74E-98    | C5orf32  |
| GATCTAGGTTTCAGACTGTG  | ENSMMUG00000021927 | 16.53   | 4.68   | 0.28 | 7.38E-05    | ITGA9    |
| GATCCTCTCGCTCGTTCACT  | ENSMMUG00000000567 | 60.46   | 17.36  | 0.29 | 3.33E-24    | BAMBI    |
| GATCTCGCGCTCCGGCCGCT  | ENSMMUG00000020787 | 166.47  | 47.97  | 0.29 | 2.10E-70    | PRR15    |
| GATCCACCAATTTCCCTGTA  | ENSMMUG00000002480 | 77.59   | 22.43  | 0.29 | 1.71E-31    | ADAMTS19 |
| GATCAGGAATTTCTCAGAGC  | ENSMMUG00000015634 | 82.23   | 23.79  | 0.29 | 1.78E-33    | CENPF    |
| GATCGCTGAGCTGCTCAGGA  | ENSMMUG00000014910 | 43.53   | 12.68  | 0.29 | 1.84E-16    | DPEP1    |
| GATCTAGCATGTGGATTTTA  | ENSMMUG00000017014 | 23.38   | 6.83   | 0.29 | 1.23E-07    | ECT2     |
| GATCCTTCAGCAAGGGGCGC  | ENSMMUG00000006059 | 66.71   | 19.50  | 0.29 | 2.12E-26    | TTL12    |
| GATCGGGCGGCTGCTTAGAC  | ENSMMUG00000015768 | 19.95   | 5.85   | 0.29 | 4.30E-06    | C19orf26 |
| GATCCCACCGGCGTGGCCT   | ENSMMUG00000012548 | 19.95   | 5.85   | 0.29 | 4.30E-06    | INTS1    |
| GATCCTGTATATGTGTTGAG  | ENSMMUG00000011551 | 384.74  | 113.11 | 0.29 | 5.11E-162   | SLC26A2  |

|                       |                    |         |        |      |             |           |
|-----------------------|--------------------|---------|--------|------|-------------|-----------|
| GATCAACTATTTTTAGCTTG  | ENSMMUG00000022900 | 15.12   | 4.49   | 0.30 | 0.000692009 | PDGFC     |
| GATCCTGTTGAAGTTAATA   | ENSMMUG00000015443 | 22.77   | 6.83   | 0.30 | 4.30E-07    | C14orf135 |
| GATCTAAATGGAAGCATCTG  | ENSMMUG00000014185 | 45.95   | 13.85  | 0.30 | 8.63E-17    | NPY2R     |
| GATCATGGTGAATATTTTTG  | ENSMMUG00000019831 | 40.11   | 12.09  | 0.30 | 2.49E-14    | NBEA      |
| GATCACCTGCTTTGACATCA  | ENSMMUG00000017326 | 64.69   | 19.70  | 0.30 | 2.53E-24    | KIF26B    |
| GATCAAATGCAACCTCACAA  | ENSMMUG00000014601 | 376.07  | 114.67 | 0.30 | 4.58E-152   | MYC       |
| GATCTGCCTCTTGCCCTGC   | ENSMMUG00000008145 | 146.12  | 44.66  | 0.31 | 1.32E-57    | S100A1    |
| GATCCAAGAACTCCTGAAAT  | ENSMMUG00000011217 | 498.40  | 152.51 | 0.31 | 2.12E-201   | SERPINA5  |
| GATCTGGGGCATGCTCTTGG  | ENSMMUG00000001656 | 456.48  | 139.83 | 0.31 | 4.60E-184   | FAM12B    |
| GATCTCTTGCTGCACCATC   | ENSMMUG00000006265 | 290.42  | 90.10  | 0.31 | 1.18E-114   | NES       |
| GATCATAAAGACTTTTTTAC  | ENSMMUG00000029416 | 85.65   | 26.72  | 0.31 | 5.11E-32    | C6orf173  |
| GATCCCACGCTCCCTCCCT   | ENSMMUG00000022989 | 47.76   | 15.02  | 0.31 | 1.30E-16    | RAP1GAP2  |
| GATCCCAGGGGCTTACCTCT  | ENSMMUG00000021867 | 53.81   | 16.97  | 0.32 | 5.92E-19    | TK1       |
| GATCCTTTTCTCTAGGAATG  | ENSMMUG00000005520 | 70.94   | 22.43  | 0.32 | 1.13E-25    | CDH11     |
| GATCAGTGTACGCGAAAAGG  | ENSMMUG00000008546 | 435.32  | 138.46 | 0.32 | 6.60E-168   | CCND2     |
| GATCAGCTGTATACATTGG   | ENSMMUG00000003398 | 135.23  | 43.10  | 0.32 | 1.53E-50    | BIRC3     |
| GATCTGCATGGAGTGCTGTG  | ENSMMUG00000009449 | 55.02   | 17.55  | 0.32 | 3.89E-19    | MDFI      |
| GATCCTGTGTTTCAAACTA   | ENSMMUG00000008795 | 24.39   | 7.80   | 0.32 | 4.89E-07    | PKD2      |
| GATCTGTGTCTCAGGCCAC   | ENSMMUG00000004703 | 133.62  | 42.90  | 0.32 | 1.88E-49    | RNF24     |
| GATCTGCCGTTCCATCCTGG  | ENSMMUG00000022589 | 135.84  | 43.68  | 0.32 | 3.27E-50    | PMEP1     |
| GATCATTATCTAAAGAATCT  | ENSMMUG00000016520 | 130.80  | 42.12  | 0.32 | 3.53E-48    | ATP7B     |
| GATCAGGGATGAGTTAGAGT  | ENSMMUG00000002022 | 31.44   | 10.14  | 0.32 | 1.07E-09    | HCN1      |
| GATCAACGTGCTGTACAACC  | ENSMMUG00000006169 | 19.35   | 6.24   | 0.32 | 5.81E-05    | TNNT1     |
| GATCGAACAGTGTCTTGTGT  | ENSMMUG00000004566 | 20.56   | 6.63   | 0.32 | 1.94E-05    | ZNF124    |
| GATCTTACTGGCCAAGCCAG  | ENSMMUG00000020202 | 258.78  | 83.86  | 0.32 | 9.78E-97    | MAGED4B   |
| GATCGATACAGCTGCTTTGG  | ENSMMUG00000021733 | 30.63   | 9.95   | 0.32 | 2.74E-09    | PRICKLE1  |
| GATCTCCAGACTGGGCTCAG  | ENSMMUG00000008859 | 20.96   | 6.83   | 0.33 | 1.68E-05    | C1orf88   |
| GATCTCTGTCCCTCTATCCC  | ENSMMUG00000007357 | 16.73   | 5.46   | 0.33 | 0.000782257 | LRRC16B   |
| GATCCGCTCGCCACGGCC    | ENSMMUG00000002779 | 47.76   | 15.60  | 0.33 | 9.19E-16    | CHST2     |
| GATCTAGTAAATTGCCTAGA  | ENSMMUG00000012321 | 3012.19 | 994.80 | 0.33 | 0           | FN1       |
| GATCCTACAGTAAATAAACC  | ENSMMUG00000018986 | 24.18   | 8.00   | 0.33 | 1.40E-06    | SEZ6L2    |
| GATCAACCTGAGTTTTAAAA  | ENSMMUG00000023785 | 29.42   | 9.75   | 0.33 | 1.54E-08    | TUBB2B    |
| GATCCACTTTCCTTCTGTGT  | ENSMMUG00000002932 | 186.22  | 62.02  | 0.33 | 1.19E-66    | DPT       |
| GATCACTGGCTCCATCATAAC | ENSMMUG00000018827 | 71.34   | 23.79  | 0.33 | 4.64E-24    | MEGF10    |
| GATCCCAGCCACCTTCTCCG  | ENSMMUG00000008338 | 69.53   | 23.21  | 0.33 | 2.33E-23    | WNT9A     |
| GATCTTTTATTAAGCATACT  | ENSMMUG00000012661 | 57.64   | 19.31  | 0.33 | 7.46E-19    | PDZRN3    |
| GATCCGAGCAAAAAGACTGG  | ENSMMUG00000022366 | 25.60   | 8.58   | 0.34 | 5.99E-07    | LRRC27    |
| GATCATCACATCTTTTCCAA  | ENSMMUG00000012534 | 44.74   | 15.02  | 0.34 | 4.87E-14    | CKS2      |
| GATCTTGGCTCAACCAAATC  | ENSMMUG00000002394 | 45.14   | 15.21  | 0.34 | 4.18E-14    | SNX26     |
| GATCATCTGGAATGATACTT  | ENSMMUG00000013205 | 32.04   | 10.92  | 0.34 | 4.19E-09    | COL24A1   |
| GATCTTCTGGGGTCTGAA    | ENSMMUG00000006915 | 119.11  | 40.95  | 0.34 | 4.76E-40    | WNT4      |
| GATCCGTTTGCATCTTCTTT  | ENSMMUG00000002634 | 223.71  | 77.03  | 0.34 | 4.89E-77    | PTCH1     |
| GATCGTAAATGAAAAGGGA   | ENSMMUG00000009817 | 151.56  | 52.27  | 0.34 | 2.27E-51    | CCNA2     |
| GATCACACACCCCGTCCGG   | ENSMMUG00000010998 | 30.84   | 10.73  | 0.35 | 2.30E-08    | TNFAIP8L1 |
| GATCAGCAGGAGGGGAAAAG  | ENSMMUG00000015825 | 87.27   | 30.42  | 0.35 | 3.74E-28    | SCNSA     |
| GATCCCACGGACATTTGGGG  | ENSMMUG00000012895 | 145.91  | 50.90  | 0.35 | 1.35E-48    | PYCR1     |
| GATCATTAACGAAAGTAA    | ENSMMUG00000020508 | 29.63   | 10.34  | 0.35 | 6.79E-08    | ZNF8      |
| GATCAATGACCCGTGCATGC  | ENSMMUG00000020776 | 26.80   | 9.36   | 0.35 | 6.99E-07    | PRKCQ     |
| GATCATTCTTCACTCAGGAC  | ENSMMUG00000004321 | 59.25   | 20.87  | 0.35 | 4.64E-18    | LAMA3     |
| GATCTTTTAGGCTTCTTAT   | ENSMMUG00000031041 | 40.91   | 14.43  | 0.35 | 1.15E-11    | NIPSNAP1  |
| GATCTTCTCCCTGAGGTG    | ENSMMUG00000018341 | 19.35   | 6.83   | 0.35 | 0.000388786 | PLCH1     |
| GATCAAACAAGAGTCTGAGC  | ENSMMUG00000004192 | 35.87   | 12.68  | 0.35 | 6.92E-10    | CCDC37    |
| GATCTGTTGAAGAACTCAGC  | ENSMMUG00000018558 | 20.96   | 7.41   | 0.35 | 0.0001107   | CAMTA1    |
| GATCTTCTGTGGTGTAAAG   | ENSMMUG00000016872 | 24.18   | 8.58   | 0.35 | 9.04E-06    | EFEMP1    |
| GATCCACAGAGGACTGGGAC  | ENSMMUG00000001153 | 48.17   | 17.16  | 0.36 | 5.91E-14    | PDGFRL    |
| GATCACATTAGCCAAATGCA  | ENSMMUG00000018237 | 21.77   | 7.80   | 0.36 | 7.99E-05    | PLXNC1    |
| GATCTATTTGTATATAAGTC  | ENSMMUG00000023310 | 106.41  | 38.22  | 0.36 | 2.32E-33    | TSPAN12   |
| GATCTGATTCCGTGGTCAAG  | ENSMMUG00000018861 | 128.58  | 46.22  | 0.36 | 9.40E-41    | HEYL      |
| GATCTGAGGACACTGCCGAG  | ENSMMUG00000009909 | 40.11   | 14.43  | 0.36 | 5.20E-11    | CIB2      |
| GATCAGGTTCTGTGGATGAG  | ENSMMUG00000030915 | 44.34   | 15.99  | 0.36 | 2.17E-12    | LAYN      |
| GATCTGTATATTTTTTTTTC  | ENSMMUG00000014983 | 44.74   | 16.19  | 0.36 | 1.84E-12    | ANPEP     |
| GATCACTGTGGGTCAAGAA   | ENSMMUG00000018866 | 41.32   | 15.02  | 0.36 | 3.18E-11    | HPCAL4    |
| GATCCTTCCTAAGGTACAGC  | ENSMMUG00000021371 | 599.17  | 218.81 | 0.37 | 1.63E-193   | GATA2     |
| GATCAGCTAGACTGCTTTT   | ENSMMUG00000013172 | 134.83  | 49.34  | 0.37 | 1.01E-41    | RFX5      |
| GATCAGGGAGTGTGTCCAAG  | ENSMMUG00000014409 | 35.07   | 12.87  | 0.37 | 5.61E-09    | ANKRD13B  |
| GATCAGACTGTTTCCAGCTGC | ENSMMUG00000007802 | 30.23   | 11.12  | 0.37 | 2.35E-07    | CENPT     |
| GATCCAAGAGATATATTTGG  | ENSMMUG00000015614 | 91.30   | 33.74  | 0.37 | 4.46E-27    | TRPV2     |
| GATCCGAGACTCTGCCAGGA  | ENSMMUG00000005784 | 36.88   | 13.65  | 0.37 | 1.99E-09    | TTC9      |
| GATCACTCCACTGCTCCATG  | ENSMMUG00000009054 | 21.56   | 8.00   | 0.37 | 0.000209811 | GRIA3     |
| GATCAGGACAGCAAGCAAGA  | ENSMMUG00000015380 | 22.57   | 8.39   | 0.37 | 0.000102887 | PSRC1     |
| GATCCCCAGGCCCATCCGG   | ENSMMUG00000006348 | 173.12  | 64.36  | 0.37 | 6.02E-53    | DENND1A   |

|                       |                     |         |         |      |             |          |
|-----------------------|---------------------|---------|---------|------|-------------|----------|
| GATCAAAACAATGATATTC   | ENSMMUG00000020408  | 35.07   | 13.07   | 0.37 | 9.96E-09    | HPGD     |
| GATCTAAGAGTTGGATGGTT  | ENSMMUG00000017438  | 76.79   | 28.67   | 0.37 | 5.03E-22    | DCBLD2   |
| GATCAGGCCAGCAGGGGCA   | ENSMMUG00000009712  | 285.18  | 106.48  | 0.37 | 4.64E-88    | TMEM101  |
| GATCGCTGCAGCCATGTTTT  | ENSMMUG00000031463  | 615.90  | 232.46  | 0.38 | 1.54E-189   | PUS1     |
| GATCCGAGGAGGCGGAACAA  | ENSMMUG00000017920  | 8023.04 | 3043.67 | 0.38 | 0           | SPG7     |
| GATCTGGGGCCCTCGGGCC   | ENSMMUG00000001420  | 182.19  | 69.23   | 0.38 | 5.63E-54    | MFAP2    |
| GATCGTGAGGGTTCCTCAC   | ENSMMUG00000023073  | 24.59   | 9.36    | 0.38 | 4.37E-05    | CCNJL    |
| GATCTTAAAAACAAGAATCT  | ENSMMUG00000002003  | 32.25   | 12.29   | 0.38 | 1.78E-07    | USF1     |
| GATCAACGCATTTTCATATGG | ENSMMUG00000011513  | 580.63  | 223.10  | 0.38 | 9.43E-174   | VCAN     |
| GATCCTCAGTAGAACAATCC  | ENSMMUG00000003854  | 30.84   | 11.90   | 0.39 | 7.46E-07    | SH3BP1   |
| GATCACCAGTTGTACCAAAA  | ENSMMUG00000000238  | 22.17   | 8.58    | 0.39 | 0.000378528 | HECTD2   |
| GATCCTGGAATCAGGGTTA   | ENSMMUG00000011269  | 24.18   | 9.36    | 0.39 | 9.08E-05    | CFTR     |
| GATCAAATGAATGCTTCAGG  | ENSMMUG00000017255  | 47.36   | 18.33   | 0.39 | 7.80E-12    | HELLS    |
| GATCGGATGTGGGAACCTGG  | ENSMMUG00000006616  | 108.63  | 42.12   | 0.39 | 3.17E-30    | NEDD4L   |
| GATCCTAGCATCCCTTTTCA  | ENSMMUG00000016627  | 111.45  | 43.29   | 0.39 | 5.57E-31    | TPMT     |
| GATCCCCGTGTGCTGACCAG  | ENSMMUG00000016207  | 32.85   | 12.87   | 0.39 | 3.12E-07    | PASK     |
| GATCAGAGGACCACCCGAGT  | ENSMMUG00000006395  | 54.21   | 21.26   | 0.39 | 1.39E-13    | H2AFY2   |
| GATCTCCCCACCCATGTCT   | ENSMMUG00000008443  | 98.96   | 38.81   | 0.39 | 8.40E-27    | TSKU     |
| GATCTGGGAGTGGAGGCCA   | ENSMMUG00000007255  | 28.82   | 11.31   | 0.39 | 5.33E-06    | MAP1A    |
| GATCAGCAGAGGCTTGAGAT  | ENSMMUG00000008625  | 39.70   | 15.60   | 0.39 | 3.16E-09    | PPP1R3F  |
| GATCCAGAAATAAAGTCTAA  | ENSMMUG000000028729 | 765.24  | 301.70  | 0.39 | 1.55E-220   | KLK4     |
| GATCACAAAATCAAGGTGC   | ENSMMUG00000018728  | 128.58  | 50.71   | 0.39 | 3.33E-35    | PRTFDC1  |
| GATCCTCCTGAAGCCCTTTT  | ENSMMUG00000009097  | 124.95  | 49.34   | 0.39 | 4.55E-34    | MMP11    |
| GATCTTCAAAAATAATGCCT  | ENSMMUG00000006876  | 34.06   | 13.46   | 0.40 | 1.84E-07    | TSPAN7   |
| GATCGCCTGTGCTGCTGTTG  | ENSMMUG00000007696  | 188.84  | 74.69   | 0.40 | 1.63E-52    | PDIA5    |
| GATCCAGTGGTGGGAGAAGC  | ENSMMUG00000008661  | 71.95   | 28.47   | 0.40 | 1.59E-18    | SLC7A1   |
| GATCAGAATGGACCAGTCCC  | ENSMMUG00000005902  | 39.90   | 15.80   | 0.40 | 3.79E-09    | FRMPD1   |
| GATCCTTATTCTTTAAGTCT  | ENSMMUG00000011151  | 33.46   | 13.26   | 0.40 | 3.14E-07    | KCNK13   |
| GATCACTGGCAAGCTGGGA   | ENSMMUG00000013404  | 325.89  | 129.69  | 0.40 | 2.65E-91    | SEC14L2  |
| GATCAGGGTAGTGAATGTT   | ENSMMUG00000012287  | 126.36  | 50.32   | 0.40 | 5.45E-34    | TMSB15A  |
| GATCAATAAAATGATTTTTT  | ENSMMUG00000017649  | 80.62   | 32.18   | 0.40 | 9.97E-21    | E2F3     |
| GATCAGACTCCAAGGGCCGT  | ENSMMUG00000014174  | 428.27  | 171.23  | 0.40 | 9.83E-120   | PLOD1    |
| GATCTGGCCAAGTCCCAT    | ENSMMUG00000021232  | 101.58  | 40.76   | 0.40 | 1.71E-26    | HSPB8    |
| GATCTGGCCAGAATGAGGA   | ENSMMUG00000015080  | 56.23   | 22.62   | 0.40 | 1.67E-13    | PIK3R3   |
| GATCACAGCCACCCTCACCC  | ENSMMUG00000017546  | 38.29   | 15.41   | 0.40 | 2.21E-08    | EMILIN2  |
| GATCAGAAAGACTGTGTCA   | ENSMMUG00000017234  | 409.53  | 165.38  | 0.40 | 1.64E-112   | LRRCS9   |
| GATCCGGTACGCCATATCA   | ENSMMUG00000022552  | 57.04   | 23.21   | 0.41 | 1.97E-13    | RPS9     |
| GATCCCAGACTAGCTTGGGA  | ENSMMUG00000014230  | 43.13   | 17.55   | 0.41 | 1.55E-09    | FMO4     |
| GATCCCTTAGGGCACACAAC  | ENSMMUG00000005123  | 25.39   | 10.34   | 0.41 | 0.000155869 | ZNF114   |
| GATCTGCTGATTTATACAGA  | ENSMMUG00000004875  | 46.76   | 19.11   | 0.41 | 1.86E-10    | MAD2L1   |
| GATCAAGTCGAGACTGCAGG  | ENSMMUG00000013863  | 61.07   | 24.96   | 0.41 | 1.99E-14    | C14orf68 |
| GATCTAATAATCAGATTGTT  | ENSMMUG00000016949  | 134.22  | 55.00   | 0.41 | 1.80E-34    | MAP9     |
| GATCCATACTGAAAATTGAA  | ENSMMUG00000008702  | 295.46  | 121.11  | 0.41 | 1.54E-78    | SYNPO2   |
| GATCGGGTACGGACCTTGCC  | ENSMMUG00000012742  | 64.49   | 26.52   | 0.41 | 3.40E-15    | SLC6A8   |
| GATCATCTTGAATTAATGTG  | ENSMMUG00000016994  | 54.42   | 22.43   | 0.41 | 2.25E-12    | C12orf53 |
| GATCTTATGTCATACATTTG  | ENSMMUG00000028833  | 29.22   | 12.09   | 0.41 | 2.16E-05    | ZNF506   |
| GATCTTTCAGGAAAGACGGA  | ENSMMUG00000014432  | 34.87   | 14.43   | 0.41 | 6.18E-07    | PLAT     |
| GATCTATATAATTTATGTAT  | ENSMMUG00000011940  | 188.44  | 78.01   | 0.41 | 1.99E-48    | VPS35    |
| GATCACTGCCCTTTTGGAAA  | ENSMMUG00000006171  | 28.22   | 11.70   | 0.41 | 4.39E-05    | SLC16A1  |
| GATCCAGGAGGAGCAGCAGC  | ENSMMUG00000002167  | 258.57  | 107.26  | 0.41 | 4.83E-67    | MRC2     |
| GATCCCGAGTGTGGAAACA   | ENSMMUG00000001186  | 45.55   | 18.92   | 0.42 | 8.83E-10    | PPRC1    |
| GATCATGTGTGCTCAGGGTT  | ENSMMUG00000018117  | 246.48  | 102.39  | 0.42 | 1.20E-63    | GANAB    |
| GATCTTGCAGCCAGAACCA   | ENSMMUG00000015215  | 79.00   | 32.96   | 0.42 | 1.21E-18    | LHPP     |
| GATCAGAAAGAAGATGAAGA  | ENSMMUG0000001687   | 103.79  | 43.49   | 0.42 | 4.79E-25    | NSBP1    |
| GATCCTGAGACTGGCAGGAC  | ENSMMUG00000003081  | 62.88   | 26.52   | 0.42 | 5.16E-14    | GPSM1    |
| GATCCAGGGGACCCTTGCC   | ENSMMUG00000004616  | 44.34   | 18.72   | 0.42 | 4.12E-09    | PLAUR    |
| GATCGTAGACTACTAGCAT   | ENSMMUG0000001722   | 27.61   | 11.70   | 0.42 | 0.000122886 | FAM172A  |
| GATCACTCAATAAATCTGAG  | ENSMMUG00000005485  | 287.39  | 121.89  | 0.42 | 7.74E-72    | MFRP     |
| GATCCATGTAATCTGATGTC  | ENSMMUG00000019339  | 55.02   | 23.40   | 0.43 | 9.81E-12    | APBA2    |
| GATCAGTGCTTTATTTTAGC  | ENSMMUG00000007093  | 67.72   | 28.86   | 0.43 | 5.88E-15    | LDLRAD3  |
| GATCAAAATGAATGCAGTTG  | ENSMMUG00000017806  | 127.98  | 54.61   | 0.43 | 2.29E-30    | CD109    |
| GATCTGCTTCAACCAGCATA  | ENSMMUG00000018639  | 41.52   | 17.75   | 0.43 | 3.94E-08    | MEX3B    |
| GATCGCCAGACAGTCTGCG   | ENSMMUG00000015617  | 52.00   | 22.23   | 0.43 | 7.97E-11    | PLSCR3   |
| GATCCTCCTCTTCTTCTCT   | ENSMMUG00000008596  | 46.35   | 19.89   | 0.43 | 2.71E-09    | TMEM176B |
| GATCTTATCTAGTAACTATG  | ENSMMUG00000019068  | 30.43   | 13.07   | 0.43 | 3.39E-05    | PTPLAD2  |
| GATCCCTCACAGCATCCGAG  | ENSMMUG00000023281  | 64.49   | 27.69   | 0.43 | 6.62E-14    | SLMO1    |
| GATCTGTAGTCTGTCTTGT   | ENSMMUG00000013461  | 707.60  | 305.01  | 0.43 | 9.31E-175   | HOXA10   |
| GATCCCCGAGAGTCGCCGG   | ENSMMUG00000005779  | 29.83   | 12.87   | 0.43 | 5.70E-05    | GMDS     |
| GATCATCTTATTTTFTTTA   | ENSMMUG00000021029  | 29.83   | 12.87   | 0.43 | 5.70E-05    | RCBTB1   |
| GATCGTGTCTTCAAGCAGTT  | ENSMMUG00000004382  | 32.04   | 13.85   | 0.43 | 1.62E-05    | ABHD3    |
| GATCCCTTAGCAGGGGCCCT  | ENSMMUG00000008430  | 62.68   | 27.11   | 0.43 | 3.09E-13    | CACNB3   |

|                        |                     |         |         |      |             |          |
|------------------------|---------------------|---------|---------|------|-------------|----------|
| GATCCTGTATCTTGGTTAAT   | ENSMMUG00000010842  | 90.09   | 39.00   | 0.43 | 4.61E-20    | DPY19L3  |
| GATCACCCCTAGGTCTGGTCA  | ENSMMUG000000031350 | 28.82   | 12.48   | 0.43 | 0.000115419 | PHLDA3   |
| GATCCCTTGGCCTCCGGCCC   | ENSMMUG00000017256  | 90.89   | 39.39   | 0.43 | 3.20E-20    | CACNA1G  |
| GATCCATGGCTTCTTTCCAT   | ENSMMUG000000022310 | 134.83  | 58.51   | 0.43 | 4.43E-31    | PPPDE1   |
| GATCGCCTTGTTTTAACCTG   | ENSMMUG00000000802  | 25.60   | 11.12   | 0.43 | 0.000827427 | RFX3     |
| GATCCCACACAGCATGTCCG   | ENSMMUG000000002536 | 32.25   | 14.04   | 0.44 | 1.88E-05    | CABP1    |
| GATCTGAGGAATAAAACGGC   | ENSMMUG000000021645 | 181.18  | 78.98   | 0.44 | 3.49E-42    | CHST10   |
| GATCTTTGTGTGACCTCCAG   | ENSMMUG000000006442 | 26.80   | 11.70   | 0.44 | 0.000473371 | KCNB1    |
| GATCTGCCCAAGTTCAGAGG   | ENSMMUG000000006022 | 41.52   | 18.14   | 0.44 | 1.03E-07    | VWA5B1   |
| GATCCCTTATTTATTCCTTC   | ENSMMUG000000022520 | 69.53   | 30.42   | 0.44 | 1.38E-14    | KLC2     |
| GATCTGTATTGGATGAGGAC   | ENSMMUG00000013739  | 169.29  | 74.11   | 0.44 | 6.07E-39    | RAI14    |
| GATCTTTAAAATGCAAGGCC   | ENSMMUG00000018677  | 135.84  | 59.48   | 0.44 | 9.11E-31    | NCAPD2   |
| GATCCACTCCTGTAAGGTGC   | ENSMMUG00000017564  | 752.75  | 329.97  | 0.44 | 2.75E-180   | TBCCD1   |
| GATCAGGAATGGGTGATTGG   | ENSMMUG00000015360  | 34.66   | 15.21   | 0.44 | 6.18E-06    | MCM4     |
| GATCCCTGTCCTCCTGGGCC   | ENSMMUG00000011670  | 323.87  | 142.17  | 0.44 | 3.76E-76    | PTK7     |
| GATCTGTTCCAGTGTCTGT    | ENSMMUG000000002273 | 263.41  | 115.65  | 0.44 | 1.67E-61    | ATP6V0E2 |
| GATCTTTTAGGAAAAA       | ENSMMUG00000004896  | 75.38   | 33.15   | 0.44 | 7.70E-16    | CENPV    |
| GATCCCGCCTCTGGATTCCC   | ENSMMUG00000018051  | 26.60   | 11.70   | 0.44 | 0.000660145 | FAT1     |
| GATCTTAAGGTATGTACGGA   | ENSMMUG000000004716 | 37.69   | 16.58   | 0.44 | 1.22E-06    | NETO2    |
| GATCCTGTGACTGAGGCTCC   | ENSMMUG00000016595  | 43.73   | 19.31   | 0.44 | 4.74E-08    | AXIN2    |
| GATCTGGGGGAACCCATC     | ENSMMUG00000010653  | 176.14  | 77.81   | 0.44 | 6.97E-40    | C19orf28 |
| GATCTTTATAAAGGTGTTTTA  | ENSMMUG00000019697  | 64.49   | 28.67   | 0.44 | 7.01E-13    | ACPL2    |
| GATCTGTTCGAAGTACAC     | ENSMMUG00000016131  | 37.28   | 16.58   | 0.44 | 2.34E-06    | EDN3     |
| GATCTGTGCTACCTTATTA    | ENSMMUG00000019974  | 95.13   | 42.32   | 0.44 | 3.85E-20    | NARS     |
| GATCTGACCGCCGCGCCCG    | ENSMMUG00000010956  | 40.31   | 17.94   | 0.45 | 4.61E-07    | SOCS1    |
| GATCTGTGCTACTAGTCTGTG  | ENSMMUG00000017852  | 189.65  | 84.64   | 0.45 | 3.08E-42    | ZIM2     |
| GATCAACATGTTGGAACAAA   | ENSMMUG00000016029  | 108.23  | 48.36   | 0.45 | 5.01E-23    | SLC4A4   |
| GATCAATTTAGACAGATACC   | ENSMMUG00000015246  | 225.52  | 100.83  | 0.45 | 1.76E-50    | TBC1D9   |
| GATCCTATCCTCTTATTA     | ENSMMUG000000022158 | 3423.93 | 1533.24 | 0.45 | 0           | RPL18    |
| GATCTCTGAGTTGGAACCTGA  | ENSMMUG000000023420 | 146.92  | 65.92   | 0.45 | 7.55E-32    | AGTR2    |
| GATCCCGTCTTCCAGAGAAC   | ENSMMUG00000012110  | 106.41  | 47.78   | 0.45 | 2.26E-22    | SMO      |
| GATCTCAATGATATTTGAGC   | ENSMMUG00000007756  | 35.07   | 15.80   | 0.45 | 1.31E-05    | MRAS     |
| GATCTTAATTAACCAGATT    | ENSMMUG00000016402  | 185.82  | 83.86   | 0.45 | 2.10E-40    | LHFPL2   |
| GATCCTTGTTTTATTTAAA    | ENSMMUG000000023739 | 33.25   | 15.02   | 0.45 | 3.81E-05    | CAMK2N1  |
| GATCTGCTTTTCTCTGTGTT   | ENSMMUG00000013858  | 34.46   | 15.60   | 0.45 | 2.17E-05    | ABCA4    |
| GATCCGACATTTGGAGAGA    | ENSMMUG00000013009  | 567.73  | 257.23  | 0.45 | 5.39E-127   | MEIS3    |
| GATCATCAGATTCCGCCTGG   | ENSMMUG00000017946  | 380.71  | 172.79  | 0.45 | 3.68E-84    | ROGDI    |
| GATCAATTGTCATGCTTGAA   | ENSMMUG00000014891  | 55.83   | 25.35   | 0.45 | 2.90E-10    | CA2      |
| GATCCTAGGTGCTTAGGCCT   | ENSMMUG00000010677  | 52.80   | 23.99   | 0.45 | 1.46E-09    | C10orf2  |
| GATCTGTCTGAGCAAAGAAG   | ENSMMUG000000020503 | 105.61  | 47.97   | 0.45 | 1.26E-21    | ZSCAN18  |
| GATCTGGATAGGTTGTTCTG   | ENSMMUG000000006438 | 44.14   | 20.09   | 0.46 | 1.56E-07    | CKAP4    |
| GATCTGCTTCTCCCATGAGA   | ENSMMUG000000005189 | 97.54   | 44.46   | 0.46 | 1.22E-19    | GPR162   |
| GATCCTAGGGTGTGATACT    | ENSMMUG00000015146  | 35.07   | 15.99   | 0.46 | 2.06E-05    | FTH1     |
| GATCTGACCTGTGACAAAATC  | ENSMMUG000000002227 | 140.67  | 64.16   | 0.46 | 2.39E-29    | ENAH     |
| GATCGCCCTTCCCTTCTGT    | ENSMMUG000000002407 | 139.67  | 63.97   | 0.46 | 7.34E-29    | CLEC11A  |
| GATCAAAACACTGGATTTAC   | ENSMMUG000000002755 | 42.52   | 19.50   | 0.46 | 5.17E-07    | KLHL5    |
| GATCCACTACTCTGCCTCC    | ENSMMUG000000022518 | 42.52   | 19.50   | 0.46 | 5.17E-07    | PACS1    |
| GATCTGGGAACCTCAGCCCA   | ENSMMUG00000017265  | 39.50   | 18.14   | 0.46 | 2.63E-06    | CACNA2D4 |
| GATCTGTGTGGTCCCGACG    | ENSMMUG000000006256 | 142.49  | 65.53   | 0.46 | 3.14E-29    | TARS2    |
| GATCATATTTCTGAAATTTT   | ENSMMUG000000006771 | 28.82   | 13.26   | 0.46 | 0.000746208 | DBF4     |
| GATCAGTATCACTTTAAGTC   | ENSMMUG000000014073 | 37.28   | 17.16   | 0.46 | 9.20E-06    | ALPK1    |
| GATCTAGAGGCCCCCAAATC   | ENSMMUG00000017940  | 96.54   | 44.46   | 0.46 | 5.86E-19    | GSS      |
| GATCAGGCAGGGCACAGAAT   | ENSMMUG000000002564 | 39.30   | 18.14   | 0.46 | 3.60E-06    | FRAS1    |
| GATCCTGCACGATAACAACCTC | ENSMMUG000000021516 | 140.67  | 65.14   | 0.46 | 2.14E-28    | CLU      |
| GATCGCTGGACGCTATGAGA   | ENSMMUG00000014535  | 118.30  | 54.80   | 0.46 | 1.77E-23    | SLC15A3  |
| GATCATCTAATTTTCTGCC    | ENSMMUG000000003345 | 67.72   | 31.40   | 0.46 | 2.36E-12    | ERMN     |
| GATCGCTCAGCTGGCTGTGT   | ENSMMUG00000001549  | 64.29   | 29.84   | 0.46 | 1.42E-11    | ATAD3B   |
| GATCCAAGCTCCACATTTG    | ENSMMUG000000010395 | 40.31   | 18.72   | 0.46 | 2.81E-06    | GPR161   |
| GATCGTAAACCGGTTTTATC   | ENSMMUG000000032506 | 108.63  | 50.51   | 0.46 | 3.55E-21    | DSEL     |
| GATCACAGAGGCCACAGGGA   | ENSMMUG000000020762 | 41.52   | 19.31   | 0.47 | 1.60E-06    | BTD      |
| GATCTAGTTCAGAAGGAAGC   | ENSMMUG00000014049  | 344.63  | 160.50  | 0.47 | 5.29E-72    | COL6A3   |
| GATCAACTCCTGTCTGGACC   | ENSMMUG000000032017 | 86.46   | 40.37   | 0.47 | 3.41E-16    | C9orf16  |
| GATCAAAGTGGCTGCAGCAG   | ENSMMUG00000010858  | 141.48  | 66.11   | 0.47 | 5.41E-28    | P4HA2    |
| GATCCCCCGTGGCAATGGT    | ENSMMUG00000011665  | 149.74  | 70.40   | 0.47 | 2.33E-29    | MMAB     |
| GATCGTGCTACACAACCGGA   | ENSMMUG000000008775 | 491.35  | 231.68  | 0.47 | 7.02E-101   | RABL4    |
| GATCACAGCGCTCGTGAGGA   | ENSMMUG00000019676  | 201.74  | 95.17   | 0.47 | 4.63E-40    | GPX7     |
| GATCCAGGACACCATCATGG   | ENSMMUG00000012841  | 9081.31 | 4289.26 | 0.47 | 0           | KLK3     |
| GATCCTTAGGTGCTCAATAA   | ENSMMUG00000017489  | 86.66   | 40.95   | 0.47 | 9.06E-16    | RASSF4   |
| GATCCCTGGTCCAGAATTCC   | ENSMMUG000000021120 | 1019.58 | 482.87  | 0.47 | 1.24E-209   | MAGED1   |
| GATCTGTGTATGCTCTATGG   | ENSMMUG00000015581  | 40.71   | 19.31   | 0.47 | 5.55E-06    | PHLDA1   |
| GATCCCCACAACCTCACACT   | ENSMMUG000000003304 | 43.94   | 20.87   | 0.47 | 1.23E-06    | EPHB3    |

|                       |                     |         |         |      |             |           |
|-----------------------|---------------------|---------|---------|------|-------------|-----------|
| GATCTATGAGAATGCCATTG  | ENSMMUG00000001604  | 178.56  | 84.83   | 0.48 | 1.24E-34    | GPX8      |
| GATCTGGACTTGAGGCCAC   | ENSMMUG00000015418  | 34.46   | 16.38   | 0.48 | 0.00012736  | SLC25A20  |
| GATCTATCCAAAGAGCCAGG  | ENSMMUG00000002267  | 84.04   | 39.98   | 0.48 | 5.71E-15    | LAMC3     |
| GATCGGGGGCGTATCATCAT  | ENSMMUG00000002368  | 115.48  | 55.00   | 0.48 | 1.96E-21    | CCND1     |
| GATCGGGTGTGATATTACC   | ENSMMUG000000022628 | 58.24   | 27.89   | 0.48 | 1.98E-09    | MMD       |
| GATCTCTGTGGCTAGGTTT   | ENSMMUG000000020040 | 56.43   | 27.11   | 0.48 | 5.66E-09    | PHACTR1   |
| GATCACTGCCTGCCTGGCCC  | ENSMMUG000000031521 | 162.24  | 78.01   | 0.48 | 2.16E-30    | FOXL2     |
| GATCAATGCCACTGACCCCTT | ENSMMUG00000019157  | 69.33   | 33.35   | 0.48 | 1.44E-11    | ASNS      |
| GATCCCCAGGAGGTCCCCAG  | ENSMMUG00000014325  | 387.76  | 186.83  | 0.48 | 1.83E-75    | CYBA      |
| GATCACACATCGAGACTATC  | ENSMMUG00000014011  | 2621.61 | 1265.09 | 0.48 | 0           | IGFBP7    |
| GATCTTGAATTTCCCTTCTA  | ENSMMUG00000010277  | 43.94   | 21.26   | 0.48 | 2.86E-06    | DTX4      |
| GATCCCCTGCTGTGGCACA   | ENSMMUG00000000751  | 53.41   | 25.94   | 0.49 | 4.29E-08    | NLE1      |
| GATCTGCGTATTTGTAATA   | ENSMMUG000000011819 | 104.80  | 50.90   | 0.49 | 2.58E-18    | CHSY1     |
| GATCTTTTGTCTTATGTT    | ENSMMUG00000014394  | 635.65  | 309.11  | 0.49 | 1.61E-122   | DNAJC10   |
| GATCAGGAGCGGAACCTCCAC | ENSMMUG00000011663  | 32.85   | 15.99   | 0.49 | 0.000630191 | MVK       |
| GATCTCTGTCTGCAATGTAG  | ENSMMUG000000011846 | 306.74  | 149.97  | 0.49 | 2.86E-57    | PGR       |
| GATCGTTCCCTGTCTCACTC  | ENSMMUG00000004475  | 968.79  | 474.68  | 0.49 | 1.18E-184   | MMP2      |
| GATCTGGGAACTTTTTGTCTG | ENSMMUG00000012644  | 46.56   | 22.82   | 0.49 | 1.56E-06    | AKAP1     |
| GATCACTCCCGCAGTCCTT   | ENSMMUG000000007102 | 72.76   | 35.69   | 0.49 | 1.24E-11    | NCAPD3    |
| GATCCCAGTCTCTGAAGACA  | ENSMMUG000000013175 | 336.37  | 165.18  | 0.49 | 2.27E-62    | WDR90     |
| GATCAAGTTGTTTGTATGCAA | ENSMMUG000000022766 | 47.97   | 23.60   | 0.49 | 9.93E-07    | CDCA7L    |
| GATCCTCGTCTTACAGCGAA  | ENSMMUG00000014318  | 46.15   | 22.82   | 0.49 | 2.83E-06    | PMS1      |
| GATCATGGCAAGAAGCCTG   | ENSMMUG000000004675 | 189.24  | 93.61   | 0.49 | 1.71E-33    | SMTN      |
| GATCGCAGCTAAAAAGTCAG  | ENSMMUG00000012684  | 819.66  | 406.23  | 0.50 | 7.75E-152   | ALDH6A1   |
| GATCCCAGCTGGCCCCTGTG  | ENSMMUG00000005820  | 72.76   | 36.08   | 0.50 | 2.76E-11    | AMPD2     |
| GATCTGAACATTCAAAAGAA  | ENSMMUG00000014466  | 410.94  | 204.19  | 0.50 | 1.36E-74    | PGRMC1    |
| GATCTGGCACACTGTGGATA  | ENSMMUG00000014023  | 37.28   | 18.53   | 0.50 | 0.000177819 | TLE3      |
| GATCCCAGTTCCTAGACCTC  | ENSMMUG00000016669  | 63.89   | 31.79   | 0.50 | 1.66E-09    | ZNF385A   |
| GATCTAATTAAGCTAAATTT  | ENSMMUG000000023198 | 35.27   | 17.55   | 0.50 | 0.000457314 | TET1      |
| GATCTCCCTCCATCTTCATT  | ENSMMUG000000030889 | 132.81  | 66.11   | 0.50 | 1.97E-22    | H2AFX     |
| GATCCAAAGACAGACCACAG  | ENSMMUG00000018200  | 473.41  | 236.17  | 0.50 | 1.88E-85    | C14orf166 |
| GATCGAGGTATGGAAGATG   | ENSMMUG00000018446  | 44.94   | 22.43   | 0.50 | 7.40E-06    | FGD5      |
| GATCTGTTTTGTACTTTTTA  | ENSMMUG000000009155 | 167.08  | 335.82  | 2.01 | 0           | FAM60A    |
| GATCCTGAGAAAGGGTTTGG  | ENSMMUG00000018041  | 56.63   | 114.09  | 2.01 | 0           | SPINT1    |
| GATCCTTCTATCCAGTTTTT  | ENSMMUG00000015876  | 17.13   | 34.52   | 2.02 | 0           | RTN3      |
| GATCCTGTTTGTATGCTAT   | ENSMMUG00000020491  | 26.00   | 52.46   | 2.02 | 0           | VWA5A     |
| GATCTTGACCAAGCCAATG   | ENSMMUG000000011245 | 139.46  | 281.61  | 2.02 | 0           | CRISPLD2  |
| GATCACTAACACTGAATCTT  | ENSMMUG00000019204  | 23.18   | 46.80   | 2.02 | 0           | MARVELD3  |
| GATCAGTAGCAATTAATTTG  | ENSMMUG00000003914  | 13.70   | 27.69   | 2.02 | 0           | KLHDC1    |
| GATCACTGATATTTTAGTCA  | ENSMMUG00000014784  | 71.55   | 144.70  | 2.02 | 0           | DSP       |
| GATCCCTGCTCGTGCAGGCC  | ENSMMUG000000022685 | 58.85   | 119.16  | 2.02 | 0           | SLC29A1   |
| GATCATCAGTGTCTTTTTTA  | ENSMMUG000000022303 | 251.12  | 508.61  | 2.03 | 0           | SLC7A2    |
| GATCCTGCCAGAAGAGGAGG  | ENSMMUG00000011626  | 36.68   | 74.30   | 2.03 | 0           | TBC1D17   |
| GATCTGGGCTGTGGGGCCCT  | ENSMMUG00000018034  | 60.26   | 122.28  | 2.03 | 0           | ST14      |
| GATCCCAGTGGTATCCGTGG  | ENSMMUG000000009709 | 20.56   | 41.73   | 2.03 | 0           | TMEM102   |
| GATCTTTGTTTTTTTAAAGA  | ENSMMUG00000020321  | 18.34   | 37.25   | 2.03 | 0           | USP42     |
| GATCGAGCCAAGAGCTGCAA  | ENSMMUG000000029963 | 131.40  | 267.18  | 2.03 | 0           | RND2      |
| GATCCCCAGTCCAAGTCTCT  | ENSMMUG00000014265  | 17.74   | 36.08   | 2.03 | 0           | CD27      |
| GATCCACCTCCTATAATGT   | ENSMMUG00000019696  | 22.77   | 46.41   | 2.04 | 0           | GPD1L     |
| GATCTTCGTAGTTTGTTCAT  | ENSMMUG000000021164 | 44.94   | 91.66   | 2.04 | 0           | WDFY3     |
| GATCCTAGTTCTGTGTCATA  | ENSMMUG00000018400  | 26.00   | 53.05   | 2.04 | 0           | ADFP      |
| GATCGTGGCCTGTGCTAGG   | ENSMMUG00000015689  | 72.35   | 148.02  | 2.05 | 0           | GPR56     |
| GATCAACAATGCATGGATTC  | ENSMMUG00000007637  | 17.33   | 35.49   | 2.05 | 0           | ENDOD1    |
| GATCTTATTATATATTTTTA  | ENSMMUG00000021532  | 24.18   | 49.54   | 2.05 | 0           | BXDC1     |
| GATCTAAATGTGAACAGTTT  | ENSMMUG00000014940  | 236.00  | 483.45  | 2.05 | 0           | PNRC1     |
| GATCCCAACCTGTGTCACT   | ENSMMUG000000006248 | 51.39   | 105.31  | 2.05 | 0           | WDR86     |
| GATCCAGGCCCTCTCTCTCT  | ENSMMUG00000015369  | 18.74   | 38.42   | 2.05 | 0           | NGK7      |
| GATCCTGTCTCCACCTCCT   | ENSMMUG00000016001  | 136.04  | 279.27  | 2.05 | 0           | VAT1      |
| GATCTGGTGAGCAGCCAGCA  | ENSMMUG000000000976 | 33.05   | 68.26   | 2.07 | 0           | KCNK12    |
| GATCTGCAAGTGCAGAGTGT  | ENSMMUG000000021696 | 17.94   | 37.05   | 2.07 | 0           | EBF1      |
| GATCTGATTTTTTCCCCTT   | ENSMMUG00000030250  | 267.44  | 552.88  | 2.07 | 0           | NEK8      |
| GATCCTGACACTGGAGGGCA  | ENSMMUG00000018232  | 15.92   | 32.96   | 2.07 | 0           | SESN1     |
| GATCACACAAATTTAGGGA   | ENSMMUG000000003134 | 18.54   | 38.42   | 2.07 | 0           | RNF217    |
| GATCATGTTAGCTATCAGAG  | ENSMMUG00000018265  | 19.75   | 40.95   | 2.07 | 0           | PRR5L     |
| GATCTCAGATTTGTGTAGATA | ENSMMUG000000006035 | 22.98   | 47.78   | 2.08 | 0           | THBS1     |
| GATCAGAGTGGATGTAGAGC  | ENSMMUG000000007845 | 109.84  | 228.56  | 2.08 | 0           | CBX7      |
| GATCAGGCAGAAAAGAAAAA  | ENSMMUG00000014817  | 246.68  | 514.46  | 2.09 | 0           | SLC18A2   |
| GATCCTGACTGTGCTCTATA  | ENSMMUG000000008748 | 10.28   | 21.45   | 2.09 | 0           | DUOX1     |
| GATCGAGATGAAGGAAGGAC  | ENSMMUG000000007085 | 38.29   | 79.96   | 2.09 | 0           | ZBTB16    |
| GATCCCCAAACCTCAAGGT   | ENSMMUG00000013579  | 24.18   | 50.51   | 2.09 | 0           | SLC45A4   |
| GATCCAGAAAGTGAACGAGA  | ENSMMUG00000018578  | 20.36   | 42.51   | 2.09 | 0           | LOH12CR1  |

|                       |                     |        |         |      |   |           |
|-----------------------|---------------------|--------|---------|------|---|-----------|
| GATCATTTTCTGCAACTGAG  | ENSMMUG00000016970  | 47.97  | 100.24  | 2.09 | 0 | SSR3      |
| GATCCCTGGAGGGGCTGAAC  | ENSMMUG00000003431  | 69.93  | 146.46  | 2.09 | 0 | HNFB1B    |
| GATCTGTGCCAGCTGGGCGG  | ENSMMUG00000013188  | 104.60 | 219.20  | 2.10 | 0 | SERINC2   |
| GATCTGGGACTTCGTGTGGT  | ENSMMUG000000023748 | 103.99 | 218.03  | 2.10 | 0 | HIST1H1E  |
| GATCATCTTGAATGACAATG  | ENSMMUG00000003868  | 15.52  | 32.57   | 2.10 | 0 | B3GALT4   |
| GATCCTGCATACTGAAAGCC  | ENSMMUG00000001348  | 61.87  | 129.88  | 2.10 | 0 | ERBB2     |
| GATCGTGGAGGAGGTCTCTT  | ENSMMUG00000015100  | 81.02  | 170.25  | 2.10 | 0 | ABO       |
| GATCTGTAGTTTTCATGCCT  | ENSMMUG00000015885  | 22.17  | 46.61   | 2.10 | 0 | MEGF9     |
| GATCTCAGCCTCAGTTCTCT  | ENSMMUG00000003457  | 111.45 | 234.41  | 2.10 | 0 | PRKACB    |
| GATCTGACACTTCCTTTCCA  | ENSMMUG00000002203  | 142.08 | 298.97  | 2.10 | 0 | FAM113B   |
| GATCAAACATTGGCTTACTG  | ENSMMUG00000007214  | 20.56  | 43.29   | 2.11 | 0 | CCDC117   |
| GATCTTTTTTTTCTTGGTAT  | ENSMMUG00000008289  | 10.28  | 21.65   | 2.11 | 0 | FAM45A    |
| GATCTTACAGGAAAGGATAC  | ENSMMUG00000005959  | 20.36  | 42.90   | 2.11 | 0 | GK        |
| GATCGAGGCCGCGAGTAAGCT | ENSMMUG00000015545  | 11.29  | 23.79   | 2.11 | 0 | ZDHHC4    |
| GATCTATGCTCATGAATTA   | ENSMMUG00000014558  | 23.58  | 49.73   | 2.11 | 0 | JAK2      |
| GATCACACTGCAAAATGCC   | ENSMMUG00000021699  | 146.52 | 309.30  | 2.11 | 0 | RNF145    |
| GATCTTCTGTCTAGTACTTG  | ENSMMUG00000018198  | 48.77  | 102.97  | 2.11 | 0 | CCDC6     |
| GATCTGGTTAAGTCGTGTAG  | ENSMMUG00000000997  | 64.09  | 135.34  | 2.11 | 0 | PERP      |
| GATCTGCATTATAAACGTG   | ENSMMUG00000004712  | 39.50  | 83.47   | 2.11 | 0 | LPL       |
| GATCTGATAACATGTCAGAT  | ENSMMUG00000010687  | 28.22  | 59.68   | 2.12 | 0 | HEXA      |
| GATCTCTCAACCTGCTTTCT  | ENSMMUG00000006677  | 78.00  | 164.99  | 2.12 | 0 | CREBL2    |
| GATCTATAGTATAGAATGAA  | ENSMMUG0000001051   | 75.17  | 160.70  | 2.14 | 0 | MAP2K6    |
| GATCAGCTATATAGTATTTA  | ENSMMUG00000019457  | 356.12 | 764.09  | 2.15 | 0 | VIL2      |
| GATCTACTAGATGCATTATA  | ENSMMUG00000006356  | 28.82  | 62.21   | 2.16 | 0 | CORO2B    |
| GATCACATTGCTTCTAAAA   | ENSMMUG00000005757  | 11.29  | 24.38   | 2.16 | 0 | CST7      |
| GATCTCTAAAAGGCTCTCTC  | ENSMMUG00000017010  | 24.18  | 52.27   | 2.16 | 0 | AAACL1    |
| GATCTCAAAAAAGGAATTTT  | ENSMMUG00000003707  | 18.14  | 39.20   | 2.16 | 0 | ACVR1C    |
| GATCTCCAATGTTTTGGGGA  | ENSMMUG000000023169 | 15.32  | 33.15   | 2.16 | 0 | EIF4EBP2  |
| GATCTGTTGGGTTCTCTATT  | ENSMMUG00000000073  | 9.27   | 20.09   | 2.17 | 0 | CASS4     |
| GATCGGGGTCACCGGAGCAA  | ENSMMUG00000009674  | 36.08  | 78.20   | 2.17 | 0 | ELANE     |
| GATCTAACACTAACTGTATT  | ENSMMUG00000021002  | 846.26 | 1839.04 | 2.17 | 0 | HIF1A     |
| GATCGAGAGCCGGTGAATGA  | ENSMMUG00000012683  | 61.27  | 133.39  | 2.18 | 0 | C14orf45  |
| GATCAATTAATTTTTTAAA   | ENSMMUG00000003611  | 166.07 | 361.96  | 2.18 | 0 | LDLR      |
| GATCTTGGCTTCTGTACTC   | ENSMMUG00000015001  | 34.66  | 75.67   | 2.18 | 0 | LIMK2     |
| GATCAACGCGCTGGTGCAGG  | ENSMMUG00000004676  | 274.29 | 599.69  | 2.19 | 0 | SELM      |
| GATCTCTTGTCAAATGTGA   | ENSMMUG00000004001  | 42.52  | 93.02   | 2.19 | 0 | SYT2      |
| GATCACTAGATAAGAGCTG   | ENSMMUG00000017872  | 29.02  | 63.58   | 2.19 | 0 | MINA      |
| GATCCAAGTGTGATTTGAAT  | ENSMMUG00000017609  | 57.64  | 126.37  | 2.19 | 0 | CTSL1     |
| GATCATTTTTAAGAGAATAA  | ENSMMUG00000003790  | 9.07   | 19.89   | 2.19 | 0 | MED31     |
| GATCTACGTTTCCATGGCTG  | ENSMMUG00000010113  | 15.12  | 33.15   | 2.19 | 0 | SRD5A3    |
| GATCTTTCACTAGATATTTT  | ENSMMUG000000023653 | 18.74  | 41.15   | 2.20 | 0 | STEAP2    |
| GATCAGAGTAGCCCATAGGC  | ENSMMUG00000000306  | 823.28 | 1807.83 | 2.20 | 0 | FAM82A2   |
| GATCAGGAAGTGCATCTTCA  | ENSMMUG00000008126  | 19.35  | 42.71   | 2.21 | 0 | JHDM1D    |
| GATCACAAGAAATACAAATC  | ENSMMUG00000021153  | 58.45  | 129.30  | 2.21 | 0 | SGK3      |
| GATCAATCTTTGATGGTGAG  | ENSMMUG00000001803  | 9.67   | 21.45   | 2.22 | 0 | GJA5      |
| GATCGGAGCCGCTTTCACG   | ENSMMUG00000009223  | 93.72  | 207.89  | 2.22 | 0 | PPP1R15A  |
| GATCTTCATGATGTGTGAGT  | ENSMMUG00000001915  | 17.13  | 38.03   | 2.22 | 0 | CLDN1     |
| GATCTTCAATAGAAAGAGTC  | ENSMMUG000000022585 | 10.68  | 23.79   | 2.23 | 0 | SLC25A15  |
| GATCTCATGCTGTGTCTGG   | ENSMMUG00000001347  | 18.54  | 41.34   | 2.23 | 0 | PGAP3     |
| GATCTGAACTCCTTGGCTTC  | ENSMMUG00000015325  | 9.88   | 22.04   | 2.23 | 0 | COL17A1   |
| GATCACTTACATAAAAATAC  | ENSMMUG000000029350 | 13.10  | 29.25   | 2.23 | 0 | ERO1L     |
| GATCCTGAAAGAGCTGCCTA  | ENSMMUG00000020866  | 53.81  | 120.33  | 2.24 | 0 | HOXB6     |
| GATCAAAACCTTCTTCCCT   | ENSMMUG00000000669  | 14.71  | 32.96   | 2.24 | 0 | GJB1      |
| GATCCTGGTGACAAATTAAG  | ENSMMUG00000003574  | 12.09  | 27.11   | 2.24 | 0 | WDR51B    |
| GATCAGTTTGCTAAATGAAC  | ENSMMUG00000000874  | 96.13  | 215.69  | 2.24 | 0 | CHST1     |
| GATCCGTCTGTGCCCGTGTC  | ENSMMUG00000016935  | 10.08  | 22.62   | 2.24 | 0 | CLDN5     |
| GATCTGGGGTGGGGTAACA   | ENSMMUG00000002031  | 103.19 | 231.68  | 2.25 | 0 | PRSS8     |
| GATCAGAAGAAGCAAAAAGGG | ENSMMUG00000018386  | 9.27   | 20.87   | 2.25 | 0 | SH3RF2    |
| GATCACTTGTATTTCCATC   | ENSMMUG00000029908  | 10.48  | 23.60   | 2.25 | 0 | HIST1H2BJ |
| GATCCTTTGTTAATAAAGT   | ENSMMUG00000004448  | 49.78  | 112.14  | 2.25 | 0 | TMEM144   |
| GATCTCAGGAATTACATTTT  | ENSMMUG00000016880  | 15.12  | 34.13   | 2.26 | 0 | SLC39A8   |
| GATCCCCACTACAACTCAA   | ENSMMUG00000011719  | 46.76  | 106.09  | 2.27 | 0 | SERPINB9  |
| GATCCAGTAACGCTAGTCTT  | ENSMMUG000000032579 | 9.27   | 21.06   | 2.27 | 0 | KLK7      |
| GATCCTCCAGATGGCATTCA  | ENSMMUG00000013715  | 48.17  | 109.60  | 2.28 | 0 | PAQR8     |
| GATCAGCTTAGCTAGACCAT  | ENSMMUG00000014746  | 21.77  | 49.54   | 2.28 | 0 | BCL2L2    |
| GATCTAGGTATTTTGTCTC   | ENSMMUG00000028907  | 14.31  | 32.57   | 2.28 | 0 | INSR      |
| GATCTTCTGAGCTTGTTC    | ENSMMUG00000019743  | 56.43  | 128.52  | 2.28 | 0 | KIAA1522  |
| GATCGGAAACCAAGACGGAG  | ENSMMUG00000018085  | 22.77  | 51.88   | 2.28 | 0 | SLC37A1   |
| GATCCAGGCCAGCTTGCCAC  | ENSMMUG00000019535  | 130.60 | 297.60  | 2.28 | 0 | NUPR1     |
| GATCCTGAAATCTGCATCTG  | ENSMMUG00000006093  | 16.93  | 38.61   | 2.28 | 0 | EZH1      |
| GATCTACAATGAAGCCCTCA  | ENSMMUG00000008917  | 371.23 | 848.14  | 2.28 | 0 | S100A6    |

|                       |                     |        |         |      |   |           |
|-----------------------|---------------------|--------|---------|------|---|-----------|
| GATCTGCATCCTCAGTGGGA  | ENSMMUG00000008106  | 8.87   | 20.28   | 2.29 | 0 | SLC25A17  |
| GATCAGAGTCTCTTTGGGC   | ENSMMUG00000012671  | 123.54 | 282.58  | 2.29 | 0 | SOCS2     |
| GATCCTTGGAGGTCTGTAGA  | ENSMMUG00000006731  | 116.29 | 266.20  | 2.29 | 0 | CECR2     |
| GATCAAGTTTGTCTCCGCA   | ENSMMUG00000008587  | 137.05 | 313.98  | 2.29 | 0 | CAMK2D    |
| GATCTGAAGGGTTGGGGTG   | ENSMMUG00000004313  | 14.11  | 32.37   | 2.29 | 0 | PLCB1     |
| GATCTTCATTGGGGGATTGA  | ENSMMUG00000019771  | 90.29  | 207.31  | 2.30 | 0 | PPP2R5A   |
| GATCTTTCTGAAATATGAA   | ENSMMUG00000016674  | 8.06   | 18.53   | 2.30 | 0 | B4GALT6   |
| GATCCACTATGCCTTAATGG  | ENSMMUG00000017745  | 9.07   | 20.87   | 2.30 | 0 | ANGPT1    |
| GATCTAAAAAGTAATACGG   | ENSMMUG00000015591  | 12.70  | 29.25   | 2.30 | 0 | C4orf16   |
| GATCAAGGGCTGGAATAAA   | ENSMMUG00000001819  | 8.46   | 19.50   | 2.30 | 0 | ISG15     |
| GATCCAGTACGCCTGCCTGC  | ENSMMUG00000010198  | 52.80  | 121.69  | 2.30 | 0 | CYB5R3    |
| GATCTGGGAGTCTCCTGTCTG | ENSMMUG00000003896  | 11.08  | 25.55   | 2.30 | 0 | ARHGAP6   |
| GATCAAAGGCCTCTCAGGGG  | ENSMMUG00000001433  | 9.47   | 21.84   | 2.31 | 0 | RAI2      |
| GATCGCTACTACGACCCCAA  | ENSMMUG00000002677  | 17.74  | 40.95   | 2.31 | 0 | GAL3ST1   |
| GATCAAGATGGAAGAGACA   | ENSMMUG00000014839  | 8.26   | 19.11   | 2.31 | 0 | NPAS3     |
| GATCTGCTGACAGTTTCAAT  | ENSMMUG00000017981  | 8.67   | 20.09   | 2.32 | 0 | PART1     |
| GATCAACCCAGCCTAGCCCA  | ENSMMUG00000007618  | 8.06   | 18.72   | 2.32 | 0 | TMPRSS13  |
| GATCATGCCAGAAATAGAGA  | ENSMMUG00000010257  | 37.28  | 86.78   | 2.33 | 0 | SLC5A6    |
| GATCGCTGGTAGACAGGTTT  | ENSMMUG00000017561  | 10.68  | 24.96   | 2.34 | 0 | SLC43A2   |
| GATCAGATGTGCTTTTCCTC  | ENSMMUG00000020706  | 49.98  | 117.21  | 2.35 | 0 | ETS1      |
| GATCCACGCTGGGCCTAGGA  | ENSMMUG00000004844  | 57.84  | 135.73  | 2.35 | 0 | HPN       |
| GATCATTGTATATTTCTTT   | ENSMMUG00000011850  | 37.08  | 87.17   | 2.35 | 0 | CDH1      |
| GATCTTTTGAACCTGTCTC   | ENSMMUG00000003529  | 85.65  | 201.65  | 2.35 | 0 | FAM177A1  |
| GATCATGCTTTACTCTGTGC  | ENSMMUG00000008554  | 13.91  | 32.76   | 2.36 | 0 | LAIR1     |
| GATCCTAACGAACCTACATA  | ENSMMUG00000008881  | 32.04  | 75.67   | 2.36 | 0 | ING2      |
| GATCATATTTTTTATACAG   | ENSMMUG00000002157  | 347.25 | 820.06  | 2.36 | 0 | PIM3      |
| GATCCCTCCTAATCAAATTC  | ENSMMUG00000029682  | 8.67   | 20.48   | 2.36 | 0 | KIAA0240  |
| GATCGGGAAAAAATTCGGCC  | ENSMMUG000000011848 | 240.03 | 569.46  | 2.37 | 0 | C10orf116 |
| GATCCAAAGTACTGTTTCTC  | ENSMMUG00000019367  | 33.25  | 78.98   | 2.38 | 0 | HLA-DPB1  |
| GATCATCTTGTGAATTTGTT  | ENSMMUG000000018930 | 11.89  | 28.28   | 2.38 | 0 | PER2      |
| GATCGCTGAGTGGGGTACTG  | ENSMMUG00000008329  | 17.13  | 40.76   | 2.38 | 0 | CHN2      |
| GATCTGCTCTTTTAAATTG   | ENSMMUG00000001243  | 17.94  | 42.71   | 2.38 | 0 | ADCY9     |
| GATCATTTTAAATAAAATGTA | ENSMMUG00000018688  | 26.00  | 62.21   | 2.39 | 0 | XG        |
| GATCTACATGTGTCTAGAGA  | ENSMMUG00000016004  | 511.30 | 1224.33 | 2.39 | 0 | ACPP      |
| GATCCATCAGAGTCTAAAGG  | ENSMMUG000000020016 | 8.06   | 19.31   | 2.39 | 0 | APOL4     |
| GATCTTAAACATGGTGAATT  | ENSMMUG00000010163  | 11.89  | 28.67   | 2.41 | 0 | ARHGEF3   |
| GATCAGTCCAACGCATCCAC  | ENSMMUG000000023808 | 11.29  | 27.30   | 2.42 | 0 | CARD6     |
| GATCTCTATTATTAGGCTAG  | ENSMMUG00000019745  | 8.87   | 21.45   | 2.42 | 0 | GPN1      |
| GATCAAATTCATCATTATTT  | ENSMMUG00000009322  | 8.46   | 20.48   | 2.42 | 0 | ZNF24     |
| GATCCGGTGAGCTGGGAAGC  | ENSMMUG00000020989  | 42.52  | 102.97  | 2.42 | 0 | GSTT1     |
| GATCTTTCTCAAAGAAATAT  | ENSMMUG000000016167 | 16.32  | 39.59   | 2.43 | 0 | PTGER4    |
| GATCCTCTCAAGGCAGCATC  | ENSMMUG00000001866  | 11.89  | 28.86   | 2.43 | 0 | MRGPRF    |
| GATCCTTCACACAAGCACTT  | ENSMMUG00000019657  | 66.71  | 162.06  | 2.43 | 0 | ABHD14B   |
| GATCACTCAGAGGCTGTTT   | ENSMMUG000000021900 | 26.40  | 64.16   | 2.43 | 0 | UPK3A     |
| GATCTGAGTGGGGCACTGGC  | ENSMMUG00000012094  | 71.95  | 175.13  | 2.43 | 0 | RAB17     |
| GATCCCCGAATCCCAGGTCC  | ENSMMUG00000004739  | 27.41  | 66.89   | 2.44 | 0 | BIK       |
| GATCTCCCTGAAATGGGCTT  | ENSMMUG00000012770  | 45.14  | 110.38  | 2.45 | 0 | SMAD7     |
| GATCAAAATGTCAGGCTTGG  | ENSMMUG00000000242  | 11.08  | 27.11   | 2.45 | 0 | PPP1R3C   |
| GATCTGTAAATGACTTTAAA  | ENSMMUG00000014873  | 49.98  | 122.28  | 2.45 | 0 | TOR1AIP1  |
| GATCCCAACCTCCCTCCTG   | ENSMMUG00000000369  | 79.20  | 194.04  | 2.45 | 0 | TP53I11   |
| GATCTCTGCTTATTGAAGAT  | ENSMMUG000000005353 | 10.08  | 24.77   | 2.46 | 0 | PDGFD     |
| GATCAGATAGGACTCACTT   | ENSMMUG000000023289 | 13.70  | 33.74   | 2.46 | 0 | PLD1      |
| GATCTTTGTTTTTATGTTTT  | ENSMMUG00000022262  | 6.65   | 16.38   | 2.46 | 0 | TNIK      |
| GATCGCGGCGGAGCTGGCCC  | ENSMMUG00000005688  | 48.37  | 119.16  | 2.46 | 0 | JUNB      |
| GATCATTGTGCAATAAAGCT  | ENSMMUG000000011130 | 57.04  | 140.61  | 2.47 | 0 | TRIM36    |
| GATCGACCGAATGGTGAATC  | ENSMMUG000000011286 | 46.76  | 115.84  | 2.48 | 0 | DDIT3     |
| GATCAAAATTCACCAATAC   | ENSMMUG00000018306  | 16.53  | 40.95   | 2.48 | 0 | KIAA2026  |
| GATCCAGTCTCCTAGAGCTTG | ENSMMUG000000015324 | 18.94  | 47.19   | 2.49 | 0 | SLK       |
| GATCACTCTATCCAACCCCC  | ENSMMUG000000022054 | 14.31  | 35.69   | 2.49 | 0 | HIST1H2BH |
| GATCTTTCACTGTGGATGTT  | ENSMMUG000000020236 | 17.53  | 43.88   | 2.50 | 0 | ZNF610    |
| GATCTTCTGGAAATGAGCA   | ENSMMUG00000010696  | 24.59  | 61.63   | 2.51 | 0 | KLF6      |
| GATCATCAACCTCGTGTCCA  | ENSMMUG000000005507 | 13.30  | 33.54   | 2.52 | 0 | PLXNA3    |
| GATCACCCAGCCACAACCC   | ENSMMUG00000019803  | 26.60  | 67.28   | 2.53 | 0 | TCN2      |
| GATCATTTATTTAAAAGTAC  | ENSMMUG00000019504  | 57.84  | 146.65  | 2.54 | 0 | ALDH1A2   |
| GATCTTGATATAGTCACTT   | ENSMMUG000000014055 | 204.96 | 519.92  | 2.54 | 0 | APIS2     |
| GATCTTTGTCTTTTGTCAATG | ENSMMUG00000018942  | 464.75 | 1180.06 | 2.54 | 0 | IGFBP5    |
| GATCATTTTATATTGGCATT  | ENSMMUG00000003697  | 27.41  | 69.62   | 2.54 | 0 | INPP4B    |
| GATCATTACGTTGTATGTCT  | ENSMMUG000000003799 | 16.93  | 43.10   | 2.55 | 0 | FNBP1     |
| GATCTGATTTTCTACTATG   | ENSMMUG000000001242 | 6.05   | 15.41   | 2.55 | 0 | WDR72     |
| GATCCTCTGTACTGGGAGG   | ENSMMUG00000013383  | 79.00  | 201.46  | 2.55 | 0 | TOM1      |
| GATCTGAAATACTATCCAA   | ENSMMUG00000002218  | 68.32  | 174.35  | 2.55 | 0 | ANXA3     |



|                       |                     |        |         |      |   |           |
|-----------------------|---------------------|--------|---------|------|---|-----------|
| GATCCCTAAAGAAAACAAAC  | ENSMMUG00000011607  | 7.26   | 18.53   | 2.55 | 0 | NR4A2     |
| GATCATAAAATGAATTCTTT  | ENSMMUG00000004215  | 32.25  | 82.88   | 2.57 | 0 | FAM84A    |
| GATCCTGGACACGTCCCTTC  | ENSMMUG00000009831  | 7.05   | 18.14   | 2.57 | 0 | TBC1D2    |
| GATCACCATGTGCTCAGGCC  | ENSMMUG00000011915  | 41.32  | 106.29  | 2.57 | 0 | LYST      |
| GATCAAAATGAACCATTGT   | ENSMMUG00000010589  | 13.70  | 35.30   | 2.58 | 0 | NEBL      |
| GATCTTCTAGCCAGGAAAGG  | ENSMMUG00000002375  | 42.32  | 109.02  | 2.58 | 0 | MTF1      |
| GATCTTTATTTATTACATGA  | ENSMMUG000000011578 | 29.83  | 76.84   | 2.58 | 0 | PAX8      |
| GATCACCATCTTAAATTTA   | ENSMMUG000000020725 | 16.73  | 43.10   | 2.58 | 0 | RIPK2     |
| GATCCATTCCCATGGATAA   | ENSMMUG000000017266 | 7.86   | 20.28   | 2.58 | 0 | KIAA1324  |
| GATCACTTGGAGACTCTTTT  | ENSMMUG00000002678  | 19.75  | 51.29   | 2.60 | 0 | ITGB6     |
| GATCATTAAAGAAGAAAAGTG | ENSMMUG00000003608  | 23.58  | 61.24   | 2.60 | 0 | LDB3      |
| GATCGCACTGGAAGATTTTA  | ENSMMUG00000003537  | 372.04 | 967.88  | 2.60 | 0 | FAM100B   |
| GATCCTCAGTGCAAAATGTC  | ENSMMUG000000020865 | 58.24  | 152.31  | 2.62 | 0 | HOXB5     |
| GATCAGATCGAAAAGTTATA  | ENSMMUG00000003890  | 16.12  | 42.51   | 2.64 | 0 | CYFIP1    |
| GATCTCAGGCTCCTGCAGTT  | ENSMMUG000000008079 | 14.11  | 37.25   | 2.64 | 0 | UPK1B     |
| GATCGCCTACCATTTTATAG  | ENSMMUG000000002865 | 36.28  | 95.95   | 2.64 | 0 | ABI3BP    |
| GATCAAGCATTGTTTTCCCC  | ENSMMUG000000019979 | 6.25   | 16.58   | 2.65 | 0 | PEX14     |
| GATCCATGCAGCTTTTTTTG  | ENSMMUG000000011520 | 26.20  | 69.82   | 2.66 | 0 | FKBP5     |
| GATCATGTCTGTTCCCTGTT  | ENSMMUG000000002907 | 22.17  | 59.29   | 2.67 | 0 | CTDSPL    |
| GATCTGCTACTATTTAGTTT  | ENSMMUG000000006305 | 87.67  | 234.61  | 2.68 | 0 | WWP1      |
| GATCATTCTGGCTAAAAATT  | ENSMMUG000000005626 | 56.63  | 151.73  | 2.68 | 0 | STK17B    |
| GATCGGGCACTCTGCTCAGA  | ENSMMUG000000010702 | 10.48  | 28.08   | 2.68 | 0 | EEPDI     |
| GATCTAGAGGAAGGAAGAAA  | ENSMMUG000000007768 | 7.05   | 18.92   | 2.68 | 0 | EN2       |
| GATCAATCTGGTGAATCCTT  | ENSMMUG000000016708 | 54.62  | 146.85  | 2.69 | 0 | MFHAS1    |
| GATCTTCTAATGGTCTAAAT  | ENSMMUG000000001387 | 23.38  | 62.99   | 2.69 | 0 | PAK1      |
| GATCTGCTTGAAGAACATGT  | ENSMMUG000000015725 | 95.53  | 258.01  | 2.70 | 0 | CD24L4    |
| GATCTTGGGAGAGGCCCAGA  | ENSMMUG000000021400 | 15.72  | 42.51   | 2.70 | 0 | RHOBTB1   |
| GATCACCTGTTGATACACA   | ENSMMUG000000010323 | 5.04   | 13.65   | 2.71 | 0 | ZC3H12A   |
| GATCTATATATATCTTGAAT  | ENSMMUG000000017549 | 20.96  | 56.95   | 2.72 | 0 | ENPP3     |
| GATCAAAGACTGGGCTTGT   | ENSMMUG000000007087 | 321.45 | 880.12  | 2.74 | 0 | SLC22A5   |
| GATCTGTATGTGTTCTATTC  | ENSMMUG000000013884 | 855.73 | 2344.14 | 2.74 | 0 | IVNS1ABP  |
| GATCTGTCACAGCCAGTCCC  | ENSMMUG000000016423 | 10.88  | 29.84   | 2.74 | 0 | C9orf117  |
| GATCACAGATGGATTTTGT   | ENSMMUG000000008140 | 105.40 | 289.02  | 2.74 | 0 | SGK1      |
| GATCTGTCAATAGTAATTC   | ENSMMUG000000013804 | 11.08  | 30.42   | 2.74 | 0 | PPFIA2    |
| GATCACCAGCCATGTGCCTT  | ENSMMUG000000010093 | 91.10  | 250.41  | 2.75 | 0 | CTSH      |
| GATCTAGGAGGCTGGGGGAA  | ENSMMUG000000004137 | 11.69  | 32.18   | 2.75 | 0 | UBXN10    |
| GATCCCATGTATCTTATTAT  | ENSMMUG000000011553 | 75.98  | 209.65  | 2.76 | 0 | TIGD6     |
| GATCGAACAAGCAGCAACAC  | ENSMMUG000000008269 | 9.47   | 26.33   | 2.78 | 0 | PDE3A     |
| GATCATGAGTTCATGCGATG  | ENSMMUG000000016530 | 6.45   | 17.94   | 2.78 | 0 | NEK3      |
| GATCAAATCAGTAATTTTGT  | ENSMMUG000000014047 | 9.07   | 25.35   | 2.80 | 0 | BMX       |
| GATCGTTGGCATGGTTAAAA  | ENSMMUG000000004071 | 41.32  | 115.65  | 2.80 | 0 | TGFB2     |
| GATCGAGTTTTAAATTGATA  | ENSMMUG000000017053 | 47.56  | 133.39  | 2.80 | 0 | DAPK1     |
| GATCAGGCAAAAATAGTTTC  | ENSMMUG000000011687 | 11.49  | 32.37   | 2.82 | 0 | DSC2      |
| GATCCCCGGCACGGCAAGTA  | ENSMMUG000000019628 | 21.77  | 61.43   | 2.82 | 0 | TUBA1     |
| GATCTTCAATTCCTTGAGTC  | ENSMMUG000000018542 | 11.08  | 31.59   | 2.85 | 0 | LNPEP     |
| GATCTGCAATGAACTGGAAC  | ENSMMUG000000020156 | 5.44   | 15.60   | 2.87 | 0 | CD1D      |
| GATCCCCAGTACCCAGCCAT  | ENSMMUG000000007295 | 36.88  | 106.09  | 2.88 | 0 | CYBRD1    |
| GATCCATCTAAAAAGAAGCA  | ENSMMUG000000012257 | 8.87   | 25.55   | 2.88 | 0 | C1orf53   |
| GATCACTCCCTTTCTCGTG   | ENSMMUG000000020212 | 40.71  | 117.40  | 2.88 | 0 | SCNN1A    |
| GATCTAGAAGGAAGAGGTTG  | ENSMMUG000000023509 | 8.06   | 23.40   | 2.90 | 0 | FGF1      |
| GATCAGAGGGAGCTGCCGCC  | ENSMMUG000000004179 | 5.04   | 14.63   | 2.90 | 0 | LIMS2     |
| GATCAACTTCCGGCTGAGGC  | ENSMMUG000000008127 | 5.84   | 16.97   | 2.90 | 0 | RAB11FIP4 |
| GATCAGAACCTCCAAATACT  | ENSMMUG000000007338 | 560.07 | 1627.24 | 2.91 | 0 | TXNIP     |
| GATCGCTCACCTCGACCTTC  | ENSMMUG000000014369 | 61.27  | 178.64  | 2.92 | 0 | ZBTB3     |
| GATCTTTGAATGAGCTTTTA  | ENSMMUG000000015374 | 9.88   | 28.86   | 2.92 | 0 | LRMP      |
| GATCCACGTTTCATCTTTAA  | ENSMMUG000000020864 | 15.72  | 46.02   | 2.93 | 0 | HOXB4     |
| GATCATGCTCCATCCGGCCC  | ENSMMUG000000020434 | 6.25   | 18.33   | 2.93 | 0 | CSF3R     |
| GATCGACAGTCTACTCCC    | ENSMMUG000000002090 | 5.04   | 14.82   | 2.94 | 0 | ATP6V1B1  |
| GATCTCCAGCTGTGGTGAGC  | ENSMMUG000000017871 | 7.46   | 22.04   | 2.96 | 0 | CRYBG3    |
| GATCCCCAAGGGATATGTAT  | ENSMMUG000000014518 | 14.91  | 44.07   | 2.96 | 0 | OSGIN2    |
| GATCGTGACAAATCTTCCCT  | ENSMMUG000000023104 | 20.15  | 59.87   | 2.97 | 0 | ELMO1     |
| GATCCTATGTTTCTCCATC   | ENSMMUG000000022626 | 149.34 | 448.16  | 3.00 | 0 | HLA-DMB   |
| GATCAGACTATCTGAATATA  | ENSMMUG000000001250 | 119.92 | 360.01  | 3.00 | 0 | PTPN3     |
| GATCTGTTCTCAATAATTTA  | ENSMMUG000000013080 | 9.67   | 29.06   | 3.00 | 0 | TMEM184A  |
| GATCTGCGCTGGCCACGTGC  | ENSMMUG000000003360 | 107.22 | 323.34  | 3.02 | 0 | CENPM     |
| GATCCCCTGCTCTCGTAGAT  | ENSMMUG000000018749 | 44.74  | 134.95  | 3.02 | 0 | HAND2     |
| GATCACATCTGTAAATAGA   | ENSMMUG000000022978 | 44.54  | 134.56  | 3.02 | 0 | IL6R      |
| GATCACACTACCATTATTC   | ENSMMUG000000008987 | 7.46   | 22.62   | 3.03 | 0 | LYZ       |
| GATCAGTATGCTGTTTAAT   | ENSMMUG000000005435 | 45.95  | 139.44  | 3.03 | 0 | ICA1      |
| GATCGGGGTGTTAGCTGTG   | ENSMMUG000000008752 | 167.08 | 509.98  | 3.05 | 0 | DUOX1     |
| GATCATCAACAAAAGAAAGTC | ENSMMUG00000000476  | 9.07   | 27.69   | 3.05 | 0 | FMO5      |

|                        |                      |        |         |      |   |            |
|------------------------|----------------------|--------|---------|------|---|------------|
| GATCAGAATTGAATTTAAGT   | ENSMMUG00000004636   | 33.46  | 102.19  | 3.05 | 0 | OMD        |
| GATCATACCTATGACTTGTT   | ENSMMUG00000005586   | 41.72  | 127.54  | 3.06 | 0 | RPS6KA5    |
| GATCAATGGGTTCCTCTAGA   | ENSMMUG000000013102  | 15.92  | 48.75   | 3.06 | 0 | TRPM6      |
| GATCTCTTAAATAAACTTGC   | ENSMMUG000000008120  | 46.35  | 142.17  | 3.07 | 0 | AIM1       |
| GATCCCCTCAAGTTTCTGTG   | ENSMMUG000000000561  | 176.14 | 545.28  | 3.10 | 0 | XDH        |
| GATCCTGGGGACCAATAAAG   | ENSMMUG000000029767  | 6.05   | 18.72   | 3.10 | 0 | FN3K       |
| GATCCACTTTCAGGCCCTGC   | ENSMMUG000000020338  | 391.79 | 1215.75 | 3.10 | 0 | IGFBP6     |
| GATCCCGGCAGATGATGAGC   | ENSMMUG000000020665  | 5.84   | 18.14   | 3.10 | 0 | SDSL       |
| GATCACTTTTAAATAACCAC   | ENSMMUG000000001375  | 4.84   | 15.02   | 3.10 | 0 | FAM134B    |
| GATCTGGCCAGTTCCCCGC    | ENSMMUG000000001817  | 3.83   | 11.90   | 3.11 | 0 | HES4       |
| GATCAAGCTCAGAGACTGGC   | ENSMMUG000000012138  | 16.93  | 52.85   | 3.12 | 0 | RORC       |
| GATCCTAAAGAAATTTAGTG   | ENSMMUG000000022003  | 4.43   | 13.85   | 3.12 | 0 | MMRN1      |
| GATCAGTAAGGATTTACCT    | ENSMMUG000000012648  | 82.83  | 260.16  | 3.14 | 0 | GNPMB      |
| GATCTAGCCTGCCCTGCTTG   | ENSMMUG000000001853  | 112.46 | 354.55  | 3.15 | 0 | PMM1       |
| GATCATTCTTACTCTAAATT   | ENSMMUG000000017631  | 15.72  | 49.73   | 3.16 | 0 | GPRC5A     |
| GATCAGCTGGGGCGTGA      | ENSMMUG000000002456  | 19.75  | 62.60   | 3.17 | 0 | MAPK8IP1   |
| GATCATGTCTAATGCCATT    | ENSMMUG000000003696  | 5.84   | 18.53   | 3.17 | 0 | SULT1C2    |
| GATCACCTGACATGATTGGG   | ENSMMUG000000002242  | 59.05  | 187.22  | 3.17 | 0 | MDS1       |
| GATCTGTAACATTTGTTTCA   | ENSMMUG000000003118  | 18.74  | 59.87   | 3.19 | 0 | ADCY7      |
| GATCTCTTAAAGTCTGCTG    | ENSMMUG000000002853  | 12.50  | 40.17   | 3.22 | 0 | CORO2A     |
| GATCCACCAGCTCTTTCTGA   | ENSMMUG000000019324  | 7.86   | 25.35   | 3.23 | 0 | NEK10      |
| GATCAATGGGATGATATAGG   | ENSMMUG000000007633  | 24.39  | 78.79   | 3.23 | 0 | LMO2       |
| GATCTTCAGATATTCTTTGC   | ENSMMUG000000000040  | 14.31  | 46.41   | 3.24 | 0 | EGLN3      |
| GATCCCAAGTGTGAACAAA    | ENSMMUG000000003057  | 17.74  | 57.53   | 3.24 | 0 | KIT        |
| GATCGAGATTGGACTGCCCA   | ENSMMUG000000013557  | 7.46   | 24.38   | 3.27 | 0 | MCC        |
| GATCATTATGTTTGTGTGC    | ENSMMUG000000020919  | 57.44  | 188.19  | 3.28 | 0 | SHROOM3    |
| GATCAAGTTTGGCTCTCTTG   | ENSMMUG000000005144  | 9.88   | 32.37   | 3.28 | 0 | NEK11      |
| GATCATTTTCTGTACTGTTT   | ENSMMUG000000004851  | 3.43   | 11.31   | 3.30 | 0 | FGD4       |
| GATCTCTCCACAGGCCTTCA   | ENSMMUG000000004917  | 5.24   | 17.36   | 3.31 | 0 | PLXDC1     |
| GATCAAAAATAAGATGGCT    | ENSMMUG0000000012151 | 3.22   | 10.73   | 3.33 | 0 | GK5        |
| GATCAACCACATGCACATCC   | ENSMMUG000000002200  | 48.17  | 160.31  | 3.33 | 0 | PPAP2B     |
| GATCACGGAGGAGGCACCCC   | ENSMMUG000000020426  | 46.76  | 156.02  | 3.34 | 0 | SERPINA1   |
| GATCTCTTAAACATTTGTTGGT | ENSMMUG000000003564  | 15.12  | 50.51   | 3.34 | 0 | ITM2A      |
| GATCTCAGTGAAGAAGTGA    | ENSMMUG0000000031430 | 3.83   | 12.87   | 3.36 | 0 | TATDN3     |
| GATCTGATTTCTTTGTTTGTG  | ENSMMUG000000006702  | 99.96  | 336.02  | 3.36 | 0 | BMPR1B     |
| GATCAGCTCTGTGAATGCCA   | ENSMMUG000000003653  | 5.84   | 19.70   | 3.37 | 0 | PRTG       |
| GATCAAGCAGCTCACGGAGG   | ENSMMUG000000003834  | 3.22   | 10.92   | 3.39 | 0 | BATF       |
| GATCATTTTGTGTTGAAACT   | ENSMMUG000000001527  | 6.85   | 23.21   | 3.39 | 0 | CDC42SE2   |
| GATCTATTTCCCCCAATAAA   | ENSMMUG000000019737  | 18.74  | 63.97   | 3.41 | 0 | NTN5       |
| GATCAAGTCTGGAGCCCGG    | ENSMMUG000000007538  | 58.04  | 198.92  | 3.43 | 0 | TRPM4      |
| GATCCGTAACAAAATTATTA   | ENSMMUG000000001147  | 106.82 | 367.42  | 3.44 | 0 | C2orf29    |
| GATCTCCAGGATGTTGGCTG   | ENSMMUG000000000870  | 8.87   | 30.62   | 3.45 | 0 | TLR5       |
| GATCATGGATTTATTTTGTG   | ENSMMUG000000016149  | 90.09  | 311.06  | 3.45 | 0 | EMB        |
| GATCATCTTGAATATTGCT    | ENSMMUG000000013039  | 37.49  | 130.47  | 3.48 | 0 | SLC19A2    |
| GATCGTTCAAGAGAATGATT   | ENSMMUG000000016964  | 80.01  | 278.68  | 3.48 | 0 | VTCN1      |
| GATCTTTCCAAATGTGTTTT   | ENSMMUG000000006967  | 7.66   | 26.72   | 3.49 | 0 | LANCL3     |
| GATCGCAAGCCTTTGTTTTT   | ENSMMUG000000002843  | 14.91  | 52.27   | 3.50 | 0 | RAB26      |
| GATCAGATGTTTAACTTGG    | ENSMMUG000000020942  | 61.47  | 216.28  | 3.52 | 0 | LGR5       |
| GATCGTTCTTCAGCGAAGG    | ENSMMUG000000011127  | 34.26  | 121.11  | 3.53 | 0 | TMEM37     |
| GATCTGTAATGTTATTTCTA   | ENSMMUG000000011711  | 28.22  | 100.83  | 3.57 | 0 | CD55       |
| GATCTGTTGCAACCATGTGA   | ENSMMUG0000000030902 | 15.52  | 55.58   | 3.58 | 0 | FAM55B     |
| GATCCTTTAAGGAAATATAC   | ENSMMUG000000016431  | 4.43   | 15.99   | 3.61 | 0 | LONRF3     |
| GATCGTTAAAAATAACTAGTG  | ENSMMUG000000022906  | 99.16  | 358.45  | 3.61 | 0 | VCAM1      |
| GATCCGAAAATTCATCCATG   | ENSMMUG000000010883  | 6.45   | 23.40   | 3.63 | 0 | SPACA5B    |
| GATCTCTCCCCGTCTCCCTC   | ENSMMUG000000016421  | 15.12  | 55.00   | 3.64 | 0 | STXBP1     |
| GATCCATCTGTATTTTGAT    | ENSMMUG000000019472  | 7.86   | 28.86   | 3.67 | 0 | MFAP3L     |
| GATCATTGAACAGAAAAGGT   | ENSMMUG000000019690  | 74.97  | 276.93  | 3.69 | 0 | SESTD1     |
| GATCCAAACCCACCCTCAGG   | ENSMMUG0000000007401 | 9.27   | 34.32   | 3.70 | 0 | ARRDC2     |
| GATCCTATTAGCTGTGTAAT   | ENSMMUG000000004277  | 55.83  | 206.92  | 3.71 | 0 | SSFA2      |
| GATCATTTTCAGATTGTTCA   | ENSMMUG000000009998  | 21.97  | 81.52   | 3.71 | 0 | PVRL3      |
| GATCGCCTACTACGAGACGA   | ENSMMUG000000020218  | 10.08  | 37.44   | 3.72 | 0 | AK5        |
| GATCTTTTGGGAGATGCATC   | ENSMMUG000000010657  | 5.04   | 18.72   | 3.72 | 0 | PRAME      |
| GATCAAAACAGCAGTACAGGT  | ENSMMUG000000022273  | 58.45  | 218.42  | 3.74 | 0 | ST6GALNAC2 |
| GATCTGGAGGAGGTGAAGGC   | ENSMMUG000000016125  | 4.43   | 16.58   | 3.74 | 0 | APOA4      |
| GATCAGGGCAGTTAAGTGG    | ENSMMUG000000004379  | 23.18  | 86.98   | 3.75 | 0 | DUSP10     |
| GATCGTGTTTTAACTTTTTT   | ENSMMUG000000014588  | 83.03  | 311.84  | 3.76 | 0 | BHLHE40    |
| GATCTCAATAAAAAGAGCTGG  | ENSMMUG000000023732  | 49.78  | 188.39  | 3.78 | 0 | HIST1H1C   |
| GATCTTGGGTATGGTTTTTA   | ENSMMUG000000002573  | 2.82   | 10.73   | 3.80 | 0 | LRRC16A    |
| GATCTGGATTCTGCCTAATA   | ENSMMUG000000004867  | 37.08  | 141.58  | 3.82 | 0 | HBD        |
| GATCTATTATGAATAATGTC   | ENSMMUG000000017684  | 31.24  | 119.74  | 3.83 | 0 | TNFAIP8    |
| GATCTAATGAAAGTCAGTTA   | ENSMMUG000000017401  | 22.17  | 85.42   | 3.85 | 0 | LNX1       |

|                        |                     |        |         |      |   |           |
|------------------------|---------------------|--------|---------|------|---|-----------|
| GATCCAGCTTCACCCACTGG   | ENSMMUG00000015474  | 44.94  | 174.54  | 3.88 | 0 | MYLIP     |
| GATCTTAATAAACATTTGCT   | ENSMMUG00000023308  | 6.05   | 23.60   | 3.90 | 0 | KCND2     |
| GATCTGGTGACTTGGTGACT   | ENSMMUG00000013412  | 56.43  | 222.91  | 3.95 | 0 | CYB561    |
| GATCAATGGCTGCTGATTCC   | ENSMMUG00000018226  | 6.45   | 25.55   | 3.96 | 0 | KIF27     |
| GATCAGTGGAACTCCTGAA    | ENSMMUG00000004647  | 195.69 | 778.13  | 3.98 | 0 | RXFP1     |
| GATCGGCTTCAGAGTGATGA   | ENSMMUG00000005988  | 66.51  | 264.64  | 3.98 | 0 | RASEF     |
| GATCCCTACGCGACCTTACT   | ENSMMUG00000007950  | 13.50  | 54.41   | 4.03 | 0 | DCPS      |
| GATCTGTTACAGCCAGACT    | ENSMMUG00000008387  | 2.42   | 9.75    | 4.03 | 0 | DPP4      |
| GATCAAACTGGAAGAGTGA    | ENSMMUG00000029276  | 4.23   | 17.16   | 4.05 | 0 | ACOT6     |
| GATCCGATTAAGTATAGTTC   | ENSMMUG00000007379  | 46.35  | 188.97  | 4.08 | 0 | TPTE2     |
| GATCTTGTTTTGCTAGAGTT   | ENSMMUG00000005775  | 5.44   | 22.23   | 4.09 | 0 | PLA2G16   |
| GATCCCAAATGGTGCTTATC   | ENSMMUG00000010474  | 7.26   | 29.84   | 4.11 | 0 | HMCN1     |
| GATCCGACTTTAGAAGCCTA   | ENSMMUG00000014691  | 103.39 | 425.92  | 4.12 | 0 | ID4       |
| GATCCATTATATCTGATTTT   | ENSMMUG00000010712  | 2.22   | 9.17    | 4.13 | 0 | SYT10     |
| GATCAACAGGAAAACCTAGGA  | ENSMMUG00000001154  | 72.96  | 301.70  | 4.14 | 0 | NUDT16    |
| GATCAGACATCCTTTTATAAA  | ENSMMUG00000005882  | 53.81  | 223.88  | 4.16 | 0 | CAPN9     |
| GATCTTACCTAGTAACTATC   | ENSMMUG00000018972  | 13.30  | 55.39   | 4.16 | 0 | POLR3G    |
| GATCTTTCATTACATAAAAA   | ENSMMUG00000019892  | 25.19  | 105.12  | 4.17 | 0 | MYOM1     |
| GATCCTTGGTGTGTAGTTCA   | ENSMMUG00000006340  | 18.14  | 76.25   | 4.20 | 0 | SLC6A6    |
| GATCTTTTCTAATATGGTAT   | ENSMMUG00000005055  | 2.22   | 9.36    | 4.22 | 0 | WASF3     |
| GATCACTTTTTTTAGAGTGA   | ENSMMUG000000021628 | 7.26   | 30.81   | 4.25 | 0 | CADM1     |
| GATCGCCCAACTTCACTGGG   | ENSMMUG000000021378 | 3.43   | 14.63   | 4.27 | 0 | RASL10A   |
| GATCTCTTCGGGGAGACAGA   | ENSMMUG00000023038  | 3.83   | 16.38   | 4.28 | 0 | CALY      |
| GATCTTTTGTGGATATGTGT   | ENSMMUG00000018587  | 4.43   | 19.11   | 4.31 | 0 | ABCA8     |
| GATCCAGGTGATGTTACATG   | ENSMMUG00000022040  | 150.55 | 649.81  | 4.32 | 0 | MANEAL    |
| GATCTGACCATTACAACCTGC  | ENSMMUG00000003796  | 74.37  | 321.78  | 4.33 | 0 | DEFB1     |
| GATCTGTACAACTGATTA AAA | ENSMMUG00000010747  | 60.66  | 264.45  | 4.36 | 0 | MFAP5     |
| GATCTCTGGCTTTGCAAGGG   | ENSMMUG00000016387  | 13.91  | 60.85   | 4.38 | 0 | ADM       |
| GATCGCTATATATGTATTGC   | ENSMMUG000000022697 | 17.33  | 76.06   | 4.39 | 0 | STEAP4    |
| GATCCTGTACTGCTGTCATGG  | ENSMMUG000000031655 | 4.03   | 17.75   | 4.40 | 0 | S100A3    |
| GATCAGCAACTCCTGGCT     | ENSMMUG000000022044 | 11.89  | 52.46   | 4.41 | 0 | SCARA5    |
| GATCAGTGGGTTCCGGTGAT   | ENSMMUG00000014808  | 65.90  | 292.33  | 4.44 | 0 | GADD45A   |
| GATCCTGGCGCCTACCGGC    | ENSMMUG000000021431 | 2.02   | 8.97    | 4.45 | 0 | CLIC3     |
| GATCATCCCTTTCCCAAGG    | ENSMMUG00000003155  | 2.02   | 8.97    | 4.45 | 0 | RHOV      |
| GATCACTGAAGAACTTCTG    | ENSMMUG00000019258  | 10.68  | 47.78   | 4.47 | 0 | HLA-DRA   |
| GATCAAATGTGAAATAAATA   | ENSMMUG00000005316  | 15.52  | 69.43   | 4.47 | 0 | ADRA2A    |
| GATCTTGTAAACAAATCAGA   | ENSMMUG00000014456  | 2.42   | 10.92   | 4.52 | 0 | UGT8      |
| GATCAAAGGGAATAAAGAGA   | ENSMMUG00000004251  | 29.22  | 132.61  | 4.54 | 0 | LPIN3     |
| GATCACAGCTAACATTAAGA   | ENSMMUG000000023575 | 2.02   | 9.17    | 4.55 | 0 | C12orf35  |
| GATCTGTTGCCTTAAATTGC   | ENSMMUG00000018426  | 213.63 | 971.59  | 4.55 | 0 | GCNT3     |
| GATCTCTGCATGGTGTGGG    | ENSMMUG00000017483  | 20.96  | 97.51   | 4.65 | 0 | EPS8L2    |
| GATCAGAGAGAGAGGGAAAAG  | ENSMMUG00000018770  | 38.29  | 179.42  | 4.69 | 0 | TCEAL2    |
| GATCAAGGCAAAACAAATTA   | ENSMMUG00000001168  | 2.62   | 12.29   | 4.69 | 0 | HEG1      |
| GATCAATTAAGTGAAGAAAT   | ENSMMUG000000017640 | 3.43   | 16.19   | 4.72 | 0 | GIMAP7    |
| GATCTAATGAATGTGAACAT   | ENSMMUG00000006779  | 7.26   | 34.32   | 4.73 | 0 | MET       |
| GATCCCAGACACCATTGACAG  | ENSMMUG00000000053  | 2.02   | 9.56    | 4.74 | 0 | ANKRD20A4 |
| GATCAGAAAATTTCTGACAT   | ENSMMUG00000011671  | 6.45   | 30.81   | 4.78 | 0 | LIN7A     |
| GATCTACCAGTGTGATGCT    | ENSMMUG00000015605  | 6.45   | 31.01   | 4.81 | 0 | SLC4A5    |
| GATCTGGCAGGGGATTGACA   | ENSMMUG00000017478  | 8.67   | 41.93   | 4.84 | 0 | TESC      |
| GATCTTTGGTGATTGAGAGA   | ENSMMUG000000031747 | 14.31  | 70.01   | 4.89 | 0 | HIST2H2BF |
| GATCATTTTTGTAACAAGGC   | ENSMMUG000000005041 | 5.64   | 27.69   | 4.91 | 0 | SRCIN1    |
| GATCCTCCCTGCCCAACCCT   | ENSMMUG000000000602 | 4.03   | 19.89   | 4.94 | 0 | RGS11     |
| GATCAGAAGACTTTAATTAT   | ENSMMUG00000012667  | 599.37 | 3002.33 | 5.01 | 0 | ANXA1     |
| GATCATAATTGAAAGGTCAC   | ENSMMUG00000010137  | 1.81   | 9.17    | 5.05 | 0 | MCPH1     |
| GATCACACTACGGGAGTCTC   | ENSMMUG00000003406  | 1.81   | 9.17    | 5.05 | 0 | SDC4      |
| GATCAAGCTGGACTTGTGCA   | ENSMMUG00000009842  | 55.83  | 282.58  | 5.06 | 0 | FGF7      |
| GATCATCATGATTTAAGTTG   | ENSMMUG00000017129  | 13.10  | 67.67   | 5.17 | 0 | SLC41A2   |
| GATCTTACATTTGAAAGGTA   | ENSMMUG00000001284  | 16.12  | 83.86   | 5.20 | 0 | SLC28A2   |
| GATCAGAATCATTTAAAAAT   | ENSMMUG000000019256 | 95.33  | 497.11  | 5.21 | 0 | ERRFI1    |
| GATCCCCAGCGCCAGGAGTG   | ENSMMUG00000013302  | 188.44 | 1007.08 | 5.34 | 0 | FAM184A   |
| GATCCATATAATTCTTTAAA   | ENSMMUG00000008262  | 5.64   | 30.23   | 5.36 | 0 | TMEM154   |
| GATCTGACCTTCTTAGGGT    | ENSMMUG00000016376  | 8.67   | 47.58   | 5.49 | 0 | MAP3K5    |
| GATCACTTGCCCCGCAGCCA   | ENSMMUG00000018577  | 4.43   | 24.96   | 5.63 | 0 | MANSC1    |
| GATCCTGCAGCTCCTGAAA    | ENSMMUG00000007669  | 66.71  | 381.85  | 5.72 | 0 | ISG20     |
| GATCCTGAAGTTAAATACCC   | ENSMMUG00000015530  | 10.08  | 57.92   | 5.75 | 0 | GALP      |
| GATCCTAATATGTACATTGT   | ENSMMUG00000002006  | 2.82   | 16.38   | 5.81 | 0 | PVRL4     |
| GATCAAAGGTTTAAAGTCTA   | ENSMMUG00000009107  | 17.74  | 103.36  | 5.83 | 0 | ALCAM     |
| GATCCATTCCAGCGCCTTCC   | ENSMMUG00000002529  | 19.75  | 117.40  | 5.94 | 0 | CECR1     |
| GATCATTTTGACATGAGGAT   | ENSMMUG00000010977  | 1.21   | 7.22    | 5.97 | 0 | TCEA3     |
| GATCACTTCTCTCGCTTGCC   | ENSMMUG00000008862  | 40.11  | 240.26  | 5.99 | 0 | FGL1      |
| GATCTTCCCGAAAGGATTC    | ENSMMUG00000017906  | 1.21   | 7.41    | 6.13 | 0 | DNAJB1    |

|                       |                     |         |          |       |   |          |
|-----------------------|---------------------|---------|----------|-------|---|----------|
| GATCACGGGCCAGCCCAATA  | ENSMMUG00000012608  | 4.84    | 30.23    | 6.25  | 0 | ACE      |
| GATCCATGTCTCCCTGTGG   | ENSMMUG00000014176  | 3.83    | 24.38    | 6.37  | 0 | CYTIP    |
| GATCAGTTTTTCAATAGAAC  | ENSMMUG00000018058  | 8.26    | 52.66    | 6.37  | 0 | ABCG1    |
| GATCCAATCAGCTTGAGAAA  | ENSMMUG00000001618  | 2.82    | 18.14    | 6.43  | 0 | ATP6V0D2 |
| GATCACATCACTGCACCAGC  | ENSMMUG000000005222 | 20.36   | 133.59   | 6.56  | 0 | DOC2B    |
| GATCTCGTAGCCACACTAAA  | ENSMMUG000000008685 | 31.24   | 205.36   | 6.57  | 0 | SLC28A3  |
| GATCTGGATTTCTGTAGCAA  | ENSMMUG000000000358 | 1.01    | 6.83     | 6.77  | 0 | PHF15    |
| GATCGAGGTCTATGCATGGC  | ENSMMUG000000006437 | 1.61    | 11.12    | 6.89  | 0 | CA8      |
| GATCTATTTTCTCTCAGTAG  | ENSMMUG000000012406 | 9.88    | 70.40    | 7.13  | 0 | PCOLCE2  |
| GATCACTGTGGGCTGGAGAG  | ENSMMUG000000007620 | 28.42   | 210.62   | 7.41  | 0 | TMPRSS4  |
| GATCGTGGAGACCATGATTG  | ENSMMUG00000014632  | 1.61    | 12.29    | 7.62  | 0 | BFSP1    |
| GATCCAGAGGAGGAAGAGGA  | ENSMMUG00000015344  | 2.42    | 18.92    | 7.82  | 0 | CERKL    |
| GATCTTTCCAAATACCCAAA  | ENSMMUG000000022127 | 9.27    | 73.52    | 7.93  | 0 | FXYD3    |
| GATCCCAACTAGGCACAGC   | ENSMMUG000000006029 | 1.01    | 8.00     | 7.93  | 0 | ODAM     |
| GATCACACGCCACTTACCA   | ENSMMUG00000015865  | 10.48   | 83.47    | 7.96  | 0 | ARG2     |
| GATCATAATAAAAGTGAATC  | ENSMMUG000000005518 | 3.22    | 25.74    | 7.98  | 0 | CPB1     |
| GATCTTCTCAACTGTGAGAG  | ENSMMUG000000007612 | 19.15   | 155.63   | 8.13  | 0 | LRP8     |
| GATCCATCCAGCTAAATGGA  | ENSMMUG000000021931 | 100.57  | 821.42   | 8.17  | 0 | AOX1     |
| GATCATCCCTTCTCACAGAG  | ENSMMUG000000007595 | 7.26    | 60.85    | 8.39  | 0 | CNNM4    |
| GATCAAAGGCATATACTCC   | ENSMMUG000000016191 | 0.81    | 7.22     | 8.95  | 0 | ABCA13   |
| GATCCAGCCTTCCCTGCCGT  | ENSMMUG000000007465 | 26.00   | 235.97   | 9.08  | 0 | DHRS4    |
| GATCTCACTGTAACATGGGA  | ENSMMUG000000007684 | 4.03    | 36.66    | 9.10  | 0 | SGP2     |
| GATCTAAACAAAATAGTTTC  | ENSMMUG000000015966 | 22.77   | 207.89   | 9.13  | 0 | ADH6     |
| GATCCTAACCACTGGGGAGC  | ENSMMUG000000017133 | 1.21    | 11.12    | 9.19  | 0 | C12orf45 |
| GATCGAAAACTACCTACCT   | ENSMMUG000000009602 | 0.81    | 7.41     | 9.19  | 0 | XAF1     |
| GATCAGTGTATATATCAGAG  | ENSMMUG00000012801  | 1.21    | 11.12    | 9.19  | 0 | ZNF235   |
| GATCTTAGACAGCAAGCGAG  | ENSMMUG000000029832 | 1.01    | 9.36     | 9.29  | 0 | NTSC     |
| GATCAGTAATGAAAAGCTGA  | ENSMMUG00000010830  | 1876.12 | 17565.81 | 9.36  | 0 | CRISP3   |
| GATCCATCTCAGCTTCTTTG  | ENSMMUG000000031146 | 0.60    | 5.85     | 9.68  | 0 | C2orf72  |
| GATCTGTCTGTGTTTTATACC | ENSMMUG000000020775 | 23.38   | 226.42   | 9.68  | 0 | GRB7     |
| GATCCTGACAGACTGGGGAA  | ENSMMUG000000003598 | 0.60    | 6.05     | 10.00 | 0 | TRIM7    |
| GATCGGACAGGGCTGGGAAC  | ENSMMUG000000022656 | 1.21    | 12.48    | 10.32 | 0 | PLIN4    |
| GATCAGAGCAGTCTGTCCAG  | ENSMMUG00000019407  | 5.24    | 54.80    | 10.46 | 0 | RIMS2    |
| GATCAGCCACCATCTGGAGT  | ENSMMUG000000011822 | 0.60    | 6.44     | 10.64 | 0 | PTGES    |
| GATCTTCTCTTCTATCTCCA  | ENSMMUG000000022608 | 13.70   | 146.65   | 10.70 | 0 | ATP12A   |
| GATCACTGTGTGCTCTACA   | ENSMMUG00000016831  | 2.42    | 26.33    | 10.89 | 0 | DGKI     |
| GATCCACAGAACACACGCC   | ENSMMUG000000015590 | 2.22    | 24.96    | 11.26 | 0 | SLAH2    |
| GATCTTTTTTTTTGAAGATT  | ENSMMUG000000030780 | 3.02    | 34.13    | 11.29 | 0 | FOXO1    |
| GATCTGGTTTCTAAGAGTTT  | ENSMMUG00000012185  | 2.42    | 27.69    | 11.45 | 0 | ATF3     |
| GATCTGTCTTCATTGACTGA  | ENSMMUG00000017377  | 1.41    | 16.38    | 11.61 | 0 | HDHD1A   |
| GATCTGATGTGTCTCTCACG  | ENSMMUG00000019387  | 8.06    | 97.12    | 12.05 | 0 | HLA-C    |
| GATCTTCTGTGGCTTGGGG   | ENSMMUG00000000984  | 0.40    | 5.07     | 12.58 | 0 | VILL     |
| GATCATTTTGGTTGTTGCTC  | ENSMMUG00000017919  | 1.21    | 15.80    | 13.06 | 0 | CXCL17   |
| GATCTGAAGTTGCAGTTGC   | ENSMMUG00000019891  | 1.21    | 16.19    | 13.39 | 0 | AKR1CL1  |
| GATCTTAAAGAAGATGATAT  | ENSMMUG000000007473 | 1.21    | 16.19    | 13.39 | 0 | DEFB104A |
| GATCCAGCCCTGCCCTCAG   | ENSMMUG000000007221 | 0.40    | 5.46     | 13.55 | 0 | HMOX1    |
| GATCATCCAGCTGAACAAT   | ENSMMUG00000001674  | 0.40    | 5.85     | 14.51 | 0 | ERBB4    |
| GATCTGGCGTCTGAGCTCGA  | ENSMMUG00000010378  | 6.65    | 98.87    | 14.87 | 0 | MT1E     |
| GATCCAAGTTGAGATTTGAA  | ENSMMUG000000022971 | 2.82    | 44.07    | 15.62 | 0 | CTSL2    |
| GATCAATAATCTAGTTTCAAT | ENSMMUG00000014711  | 25.60   | 411.88   | 16.09 | 0 | RBP4     |
| GATCTTTCAACTCTTAAA    | ENSMMUG000000013342 | 6.65    | 111.55   | 16.77 | 0 | HPSE     |
| GATCAATTTGTACAGCGTAC  | ENSMMUG000000008584 | 1.21    | 21.06    | 17.42 | 0 | SLCO1A2  |
| GATCTGGAATTGTAATGTAA  | ENSMMUG000000021412 | 0.40    | 7.22     | 17.90 | 0 | RNF128   |
| GATCCCAGGAGACCTGGGGC  | ENSMMUG00000013297  | 3.22    | 62.41    | 19.35 | 0 | PRKCDBP  |
| GATCGCCTGTGACCGGAAA   | ENSMMUG000000022529 | 0.40    | 7.80     | 19.35 | 0 | RPRM     |
| GATCACTAATTTATCTGCTG  | ENSMMUG00000015498  | 0.40    | 8.00     | 19.84 | 0 | C6orf132 |
| GATCTGCTCCTATTCAAACA  | ENSMMUG00000010579  | 1.21    | 24.57    | 20.32 | 0 | AHNAK2   |
| GATCAGTTTAGCAAATCTAC  | ENSMMUG00000013738  | 1.81    | 37.83    | 20.86 | 0 | C4BPA    |
| GATCTCTTTGGCTGTAGCCG  | ENSMMUG000000014927 | 0.20    | 4.29     | 21.29 | 0 | ECH1     |
| GATCACTGCGAGCAACTGAA  | ENSMMUG000000023295 | 0.20    | 4.29     | 21.29 | 0 | GJB6     |
| GATCCCCTGGACCGCCCCAC  | ENSMMUG00000010066  | 0.40    | 8.58     | 21.29 | 0 | MERTK    |
| GATCCTGCATTAATTTTA    | ENSMMUG000000004758 | 0.20    | 4.29     | 21.29 | 0 | TMEM56   |
| GATCATAGACCAAAAAACACA | ENSMMUG00000017087  | 0.60    | 13.65    | 22.58 | 0 | SLIT3    |
| GATCTACTCCATCCAGTCCT  | ENSMMUG000000021987 | 1.41    | 32.57    | 23.09 | 0 | GPX2     |
| GATCAGAATATTACTGTTAT  | ENSMMUG000000022269 | 0.20    | 4.68     | 23.22 | 0 | C4orf40  |
| GATCGCTGTAGTGCCTTGA   | ENSMMUG000000001389 | 2.62    | 61.24    | 23.37 | 0 | IRX3     |
| GATCGTAAAAAATAGAAAA   | ENSMMUG000000008858 | 5.44    | 131.05   | 24.08 | 0 | STC1     |
| GATCGCCCCACAATGGACCC  | ENSMMUG000000023132 | 0.20    | 5.07     | 25.16 | 0 | DUSP8    |
| GATCTCAGATAAAGTGACCA  | ENSMMUG00000015198  | 0.20    | 5.07     | 25.16 | 0 | GAD1     |
| GATCTTCATCTGACCATGAC  | ENSMMUG00000017618  | 0.20    | 5.07     | 25.16 | 0 | SLC26A3  |
| GATCTGGTTCTTCTTCAGA   | ENSMMUG00000011449  | 10.28   | 265.03   | 25.79 | 0 | SYT13    |

|                      |                     |        |          |        |   |          |
|----------------------|---------------------|--------|----------|--------|---|----------|
| GATCCAACGCTACATGTATT | ENSMMUG0000002916   | 1.81   | 47.19    | 26.02  | 0 | FLRT3    |
| GATCCCAGCCCTAGGTGGG  | ENSMMUG00000031964  | 0.20   | 5.46     | 27.09  | 0 | AQP5     |
| GATCAGTTTTATTCAATAA  | ENSMMUG00000014640  | 0.20   | 5.66     | 28.06  | 0 | RP1      |
| GATCAACAGGAAGAAGAACA | ENSMMUG00000014522  | 0.20   | 6.05     | 30.00  | 0 | ITIH3    |
| GATCACAGACTCTTTCCAC  | ENSMMUG00000022068  | 1.41   | 43.29    | 30.69  | 0 | SLC6A12  |
| GATCCTTAAAGAAGATGTGG | ENSMMUG00000004771  | 2.22   | 68.45    | 30.88  | 0 | CXCL14   |
| GATCCGCGTGTGAGGCAGGC | ENSMMUG00000018148  | 0.20   | 6.24     | 30.96  | 0 | CDC42EP4 |
| GATCAGATAAAGCGTTCITT | ENSMMUG00000018755  | 1.01   | 34.91    | 34.64  | 0 | CPN1     |
| GATCTCTGCAGTTTATCACA | ENSMMUG00000020034  | 0.20   | 7.02     | 34.84  | 0 | MORN4    |
| GATCTGTGTTAGAAGTGTG  | ENSMMUG00000008290  | 0.40   | 14.24    | 35.32  | 0 | ABCC11   |
| GATCCCAAGCCTGGCAAGG  | ENSMMUG00000008711  | 1.81   | 65.33    | 36.02  | 0 | CHI3L1   |
| GATCAGACTAAAAATCCTGG | ENSMMUG00000001365  | 0.20   | 8.78     | 43.54  | 0 | C2CD4B   |
| GATCCCAACTGCTCCAGCC  | ENSMMUG000000031123 | 225.12 | 10455.79 | 46.45  | 0 | SCGB1A1  |
| GATCCAAGAATATTCTTCAA | ENSMMUG00000015134  | 0.20   | 9.95     | 49.35  | 0 | SLC5A8   |
| GATCATGTCAAGTCAGTGAC | ENSMMUG00000004226  | 0.20   | 10.14    | 50.32  | 0 | ACSM1    |
| GATCTGAAGGACGAGGGATG | ENSMMUG00000016673  | 2.22   | 118.77   | 53.57  | 0 | TTR      |
| GATCATTTATTAGTAATGTA | ENSMMUG00000008233  | 1.21   | 85.03    | 70.32  | 0 | C9orf71  |
| GATCGCTTCTTTTCCTTTGC | ENSMMUG00000005876  | 0.20   | 14.63    | 72.57  | 0 | ADRB3    |
| GATCTCAAGTGAGTTCATGC | ENSMMUG00000009828  | 0.20   | 19.70    | 97.73  | 0 | LRP11    |
| GATCTTTGACTGGCTCTGG  | ENSMMUG00000018729  | 0.20   | 26.91    | 133.54 | 0 | GAST     |
| GATCGGTTTGCTATGTTCT  | ENSMMUG00000029122  | 0.20   | 27.69    | 137.41 | 0 | MT1B     |
| GATCTGCATCAGAAAATTG  | ENSMMUG00000029841  | 0.20   | 70.01    | 347.39 | 0 | HLA-C    |
